# Supplementary material for: Osteoclast-specific Plastin 3 knockout in mice fail to develop osteoporosis despite dramatic increased osteoclast resorption activity
Source: PubMed Central journal article supplement (PMC10971598; doi:10.1093/jbmrpl/ziad009), 2024-01-04
Supplement: suppinfoplus_legends_ziad009.pdf [file suppinfoplus_legends_ziad009.pdf]

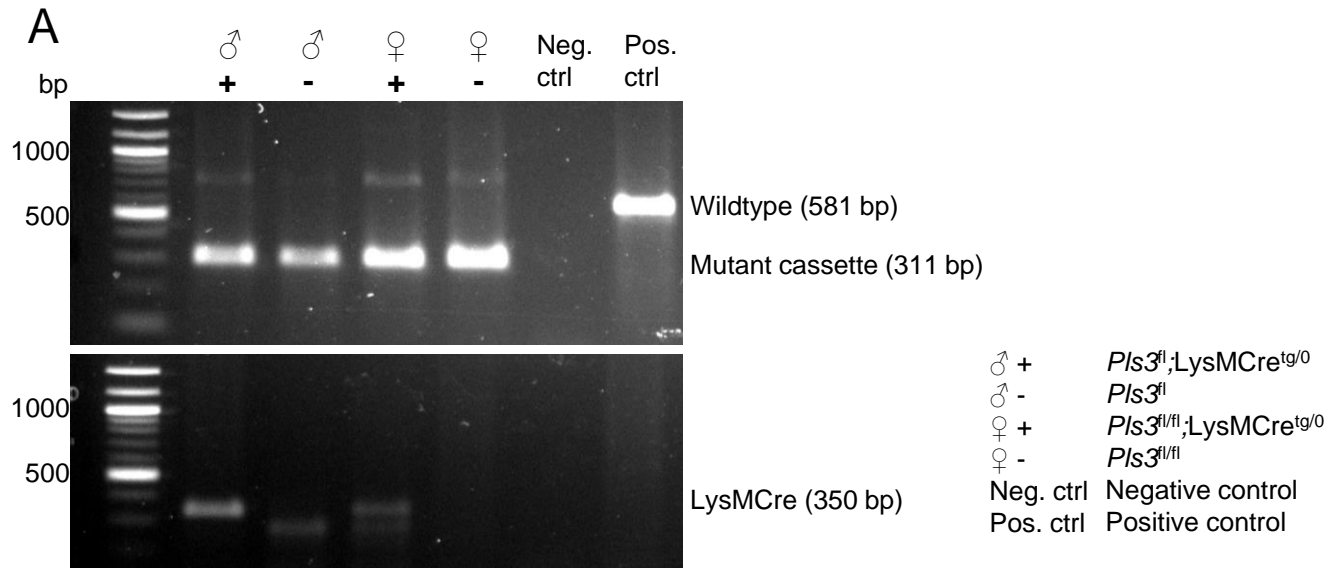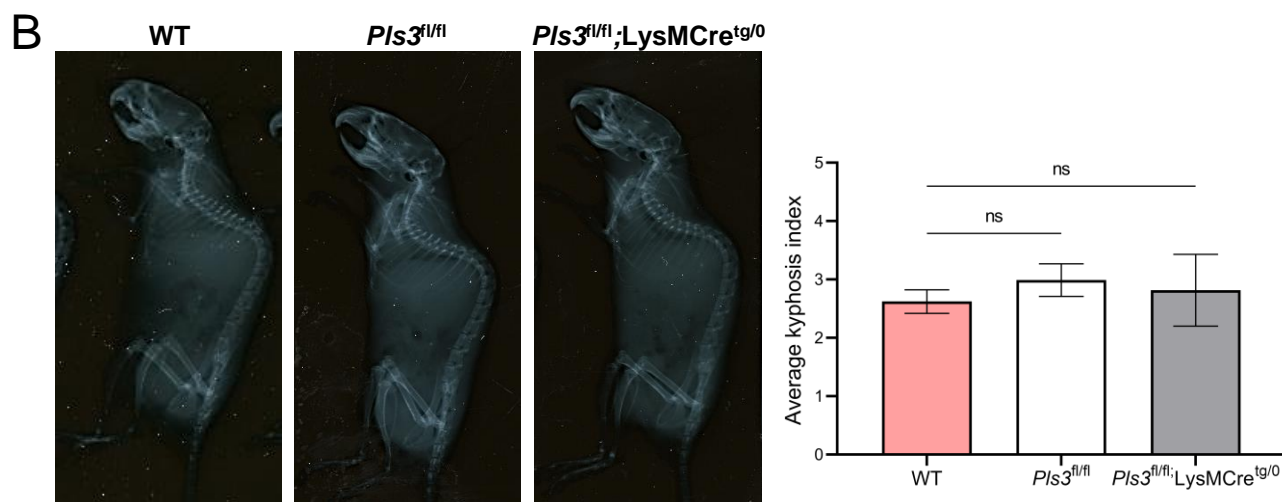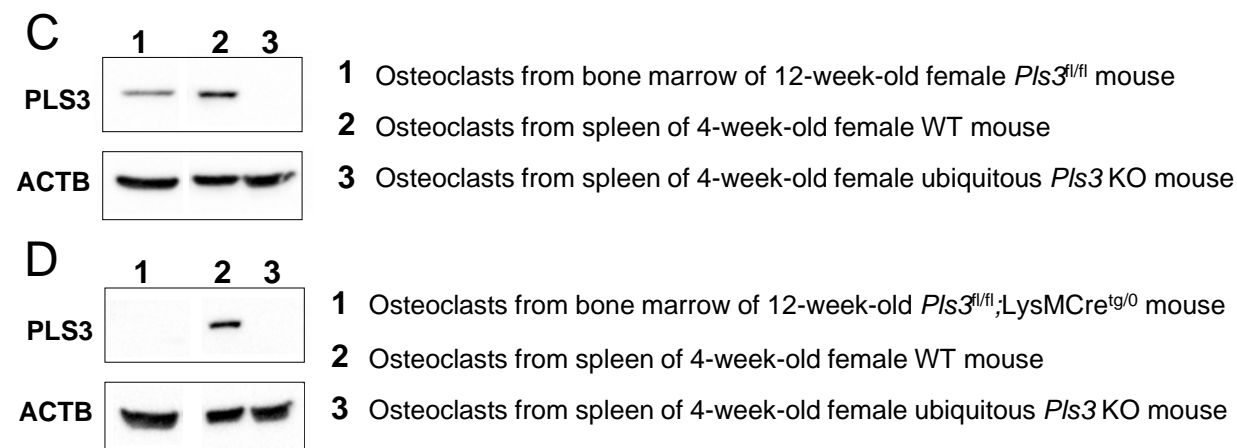

*Supplemental Fig. S1: Generation and characterization of osteoclast-specific *Pls3* KO (*Pls3<sup>fl/fl</sup>*;LysMCre<sup>tg/0</sup>) mice. (A) Genotyping of male and female osteoclast-specific *Pls3* KO mice and *Pls3*-floxed mice confirmed the successful removal of the FRT sites resulting in floxed *Pls3* alleles (cassette) (upper parts), and the presence of LysMCre (lower part). A WT sample was used as positive control. (B) Exemplary images of the lateral view of mouse whole body radiographs of 12-week-old female WT, *Pls3<sup>fl/fl</sup>*, and *Pls3<sup>fl/fl</sup>*;LysMCre<sup>tg/0</sup> mice used for the calculation of the kyphosis index. For the kyphosis index measurements and calculations, female and male osteoclast-specific *Pls3* KO mice and *Pls3*-floxed mice were used. (C) PLS3 levels in osteoclasts derived from bone marrow of 12-week-old *Pls3<sup>fl/fl</sup>* and (D) *Pls3<sup>fl/fl</sup>*;LysMCre<sup>tg/0</sup> mouse (lane 1) and from osteoclasts derived from spleen of 4-week-old WT and ubiquitous *Pls3* KO mouse (lane 2 and 3). Exposure 55kV/30seconds. N = 6-10. All results are shown as mean  $\pm$  SD. \* $P < 0.05$ , \*\* $P < 0.01$ , \*\*\* $P < 0.001$ , ns = not significant. Statistical test: unpaired two-tailed Student's *t*-test.*

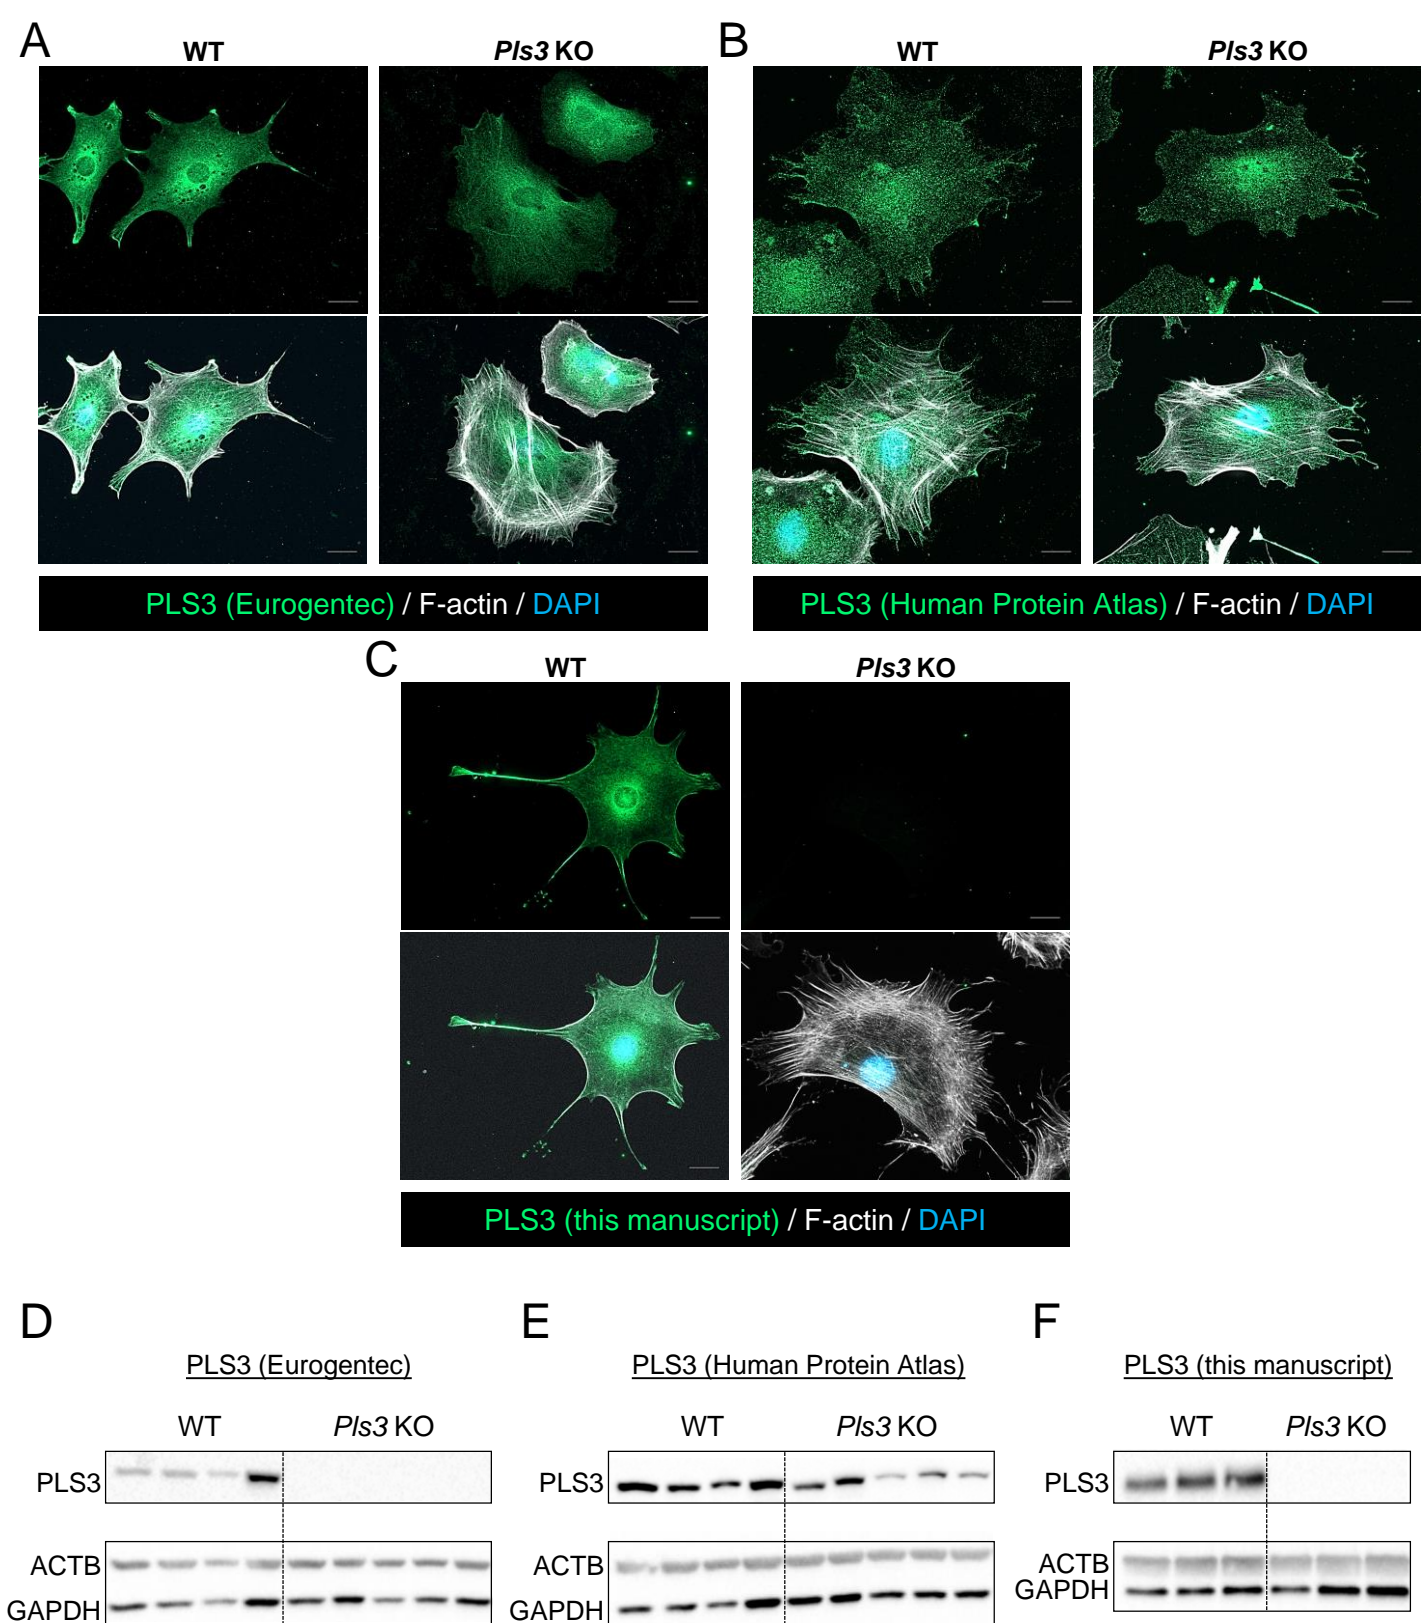

*Supplemental Fig. S2: Determination of the specificity of different PLS3 antibodies on cultivated murine embryonic fibroblasts (MEFs) and osteoclasts from WT and *Pls3* KO mice. (A-C) Immunofluorescence staining of cultivated WT control and *Pls3* KO MEFs using (A) PLS3 antibody from Eurogentec (1238), (B) PLS3 antibody from Human Protein Atlas (HPA020433), and (C) PLS3 antibody developed in this manuscript (3772). PLS3 is shown in green, F-actin in white, and nuclei are stained in blue. (D-F) Western blot analysis of PLS3 using proteins from WT control and *Pls3* KO primary differentiated osteoclasts with (A) PLS3 antibody from Eurogentec (1238), (B) PLS3 antibody from Human Protein Atlas (HPA020433), and (C) PLS3 antibody developed in this manuscript (3772). Scale bar: 20  $\mu$ m. (D-F) N=3-5.*

A

48-weeks

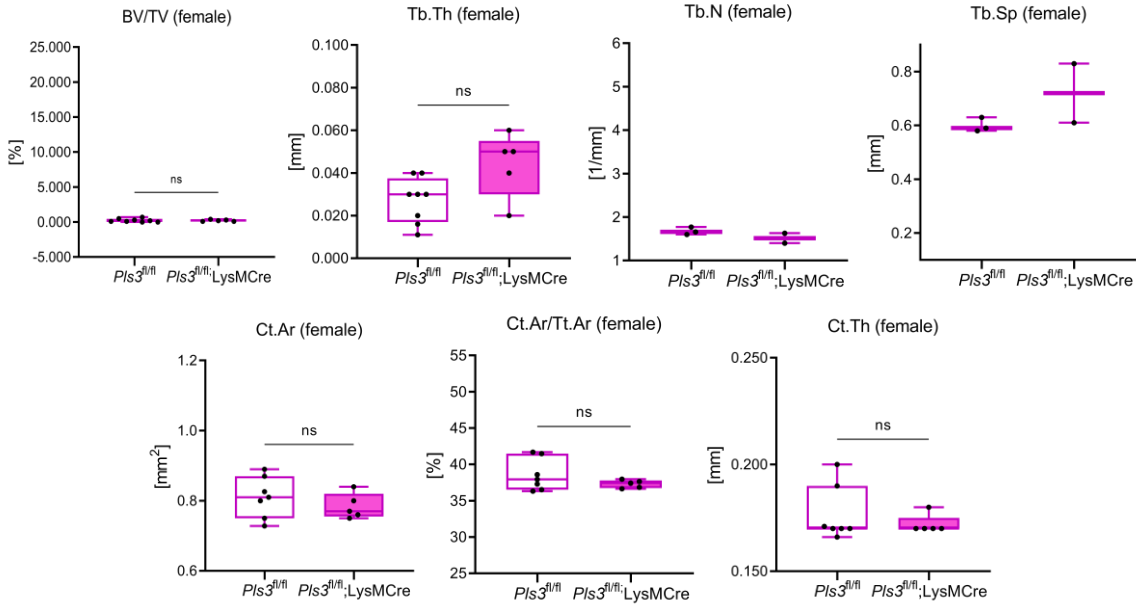

**Supplemental Fig. S3:** MicroCT data of the femora from 48-week-old female *Pls3<sup>fl/fl</sup>;LysMCre<sup>tg/0</sup>* mice and their *Pls3<sup>fl/fl</sup>* littermates. . Shown are bone volume fraction (BV/TV, %), trabecular thickness (Tb.Th, mm), trabecular number (Tb.N, 1/mm), trabecular separation (Tb.Sp, mm), cortical area (Ct.Ar, mm<sup>2</sup>), ratio of Ct.Area to tissue area (Ct.Ar/Tt.Ar, %) ratio and cortical thickness (Ct.Th, mm). N = 2-5 of 48-week-old female *Pls3<sup>fl/fl</sup>;LysMCre<sup>tg/0</sup>* mice; N = 3-8 of 48-week-old female *Pls3<sup>fl/fl</sup>* mice. All results are shown as box plots, representing individual data points with median as a line, interquartile range (25th to 75th percentile), and min to max as whiskers. \* $P < 0.05$ , \*\* $P < 0.01$ , \*\*\* $P < 0.001$ , ns = not significant. Statistical test: Mann-Whitney U test.

**A****12-weeks**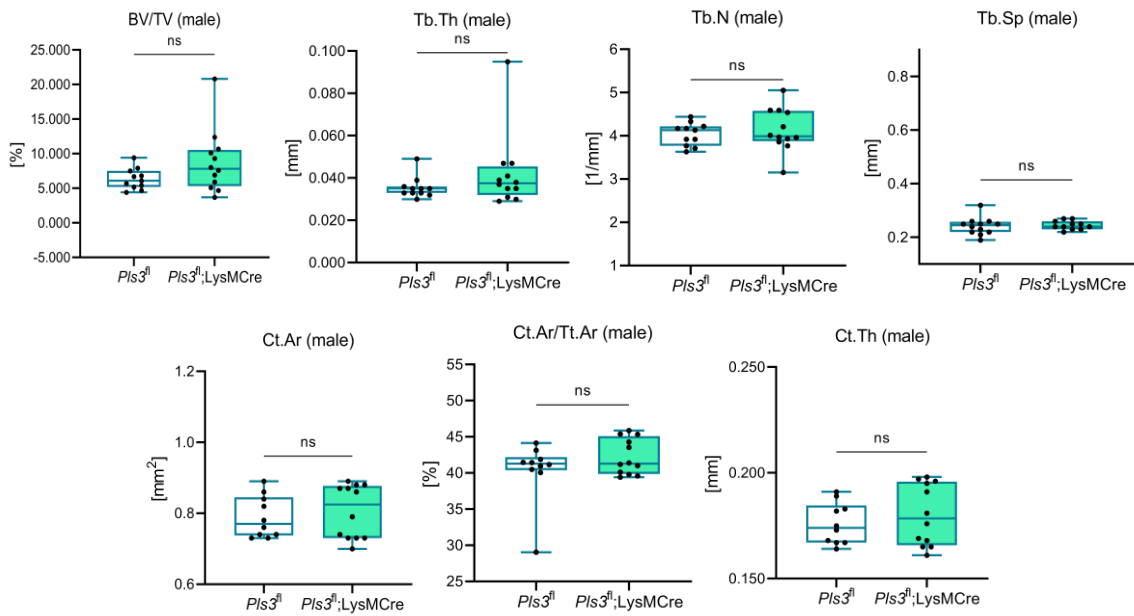**B****24-weeks**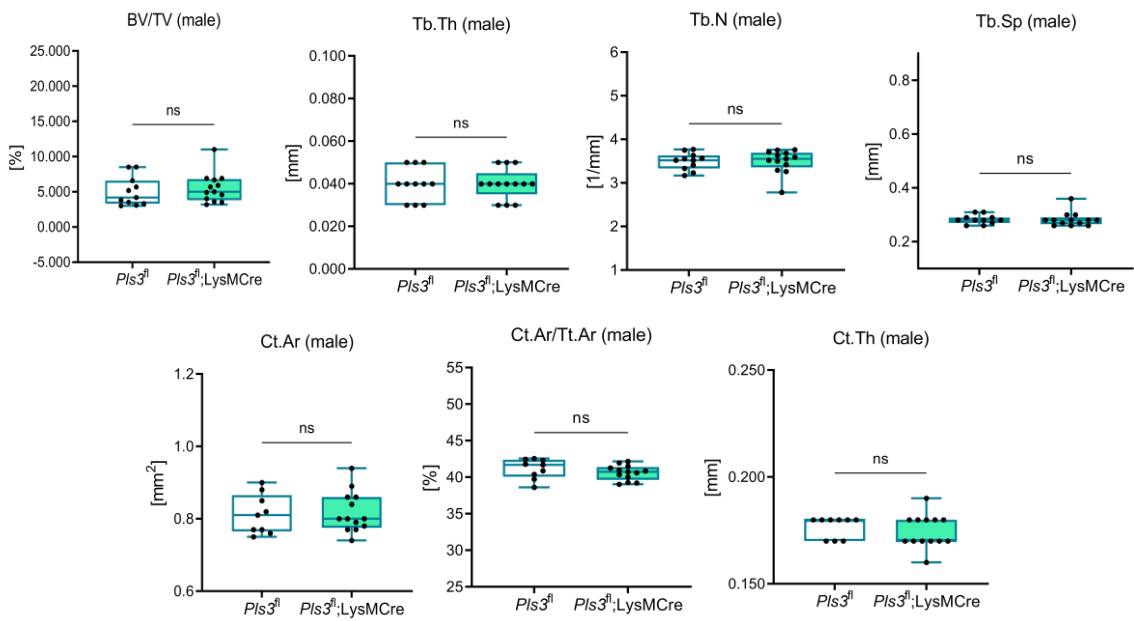**C****48-weeks**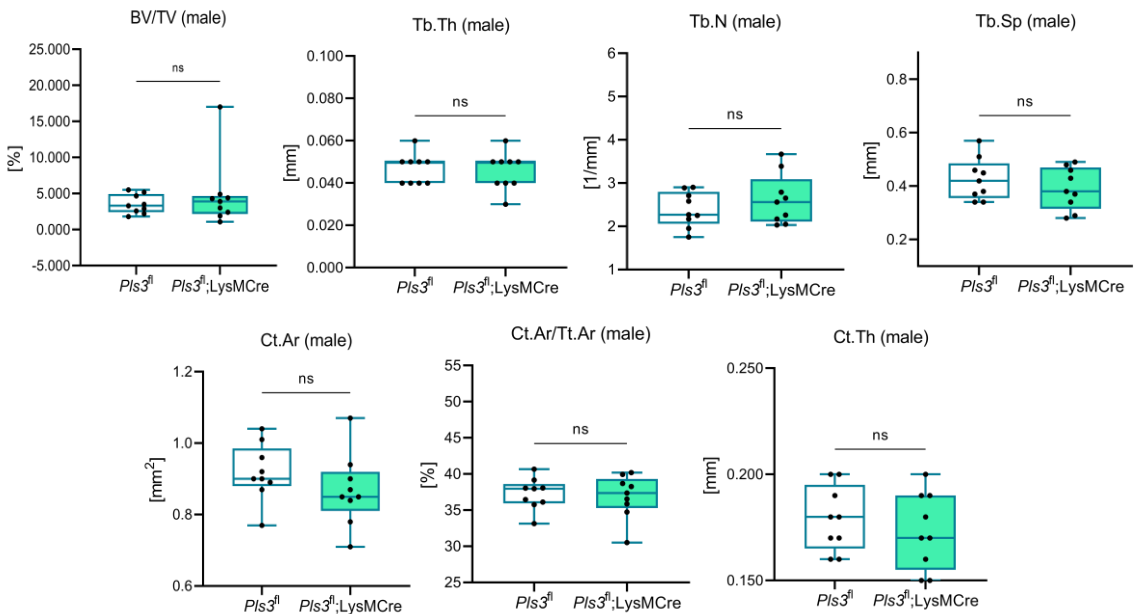

*Supplemental Fig. S4:* MicroCT data of femora from male  $Pls3^{fl};LysMCre^{tg/0}$  mice and their  $Pls3^{fl}$  littermates. Shown are bone volume fraction (BV/TV, %), bone mineral density (BMD, mmHA/cm<sup>3</sup>), trabecular number (Tb.N, 1/mm), trabecular separation (Tb.Sp, mm), trabecular thickness (Tb.Th, mm), and connectivity density (Conn.D, 1/mm<sup>3</sup>), vertebral foramen A/P (mm), vertebral foramen M/L (mm), cross sectional area of the vertebral foramen (mm<sup>2</sup>) and vertebral body height (mm) for (A) 12-, (B) 24-, and (C) 48-week-old mice. N = 12 of 12-week-old male  $Pls3^{fl};LysMCre^{tg/0}$  mice; N = 11 of 12-week-old male  $Pls3^{fl}$  mice; N = 13 of 24-week-old male  $Pls3^{fl};LysMCre^{tg/0}$  mice; N = 9-11 of 24-week-old male  $Pls3^{fl}$  mice; N = 9 of 48-week-old male  $Pls3^{fl};LysMCre^{tg/0}$  mice; N = 9 of 48-week-old male  $Pls3^{fl}$  mice. All results are shown as box plots, representing individual data points with median as a line, interquartile range (25th to 75th percentile), and min to max as whiskers. \* $P < 0.05$ , \*\* $P < 0.01$ , \*\*\* $P < 0.001$ , ns = not significant. Statistical test: Mann-Whitney U test.

**A****12-weeks**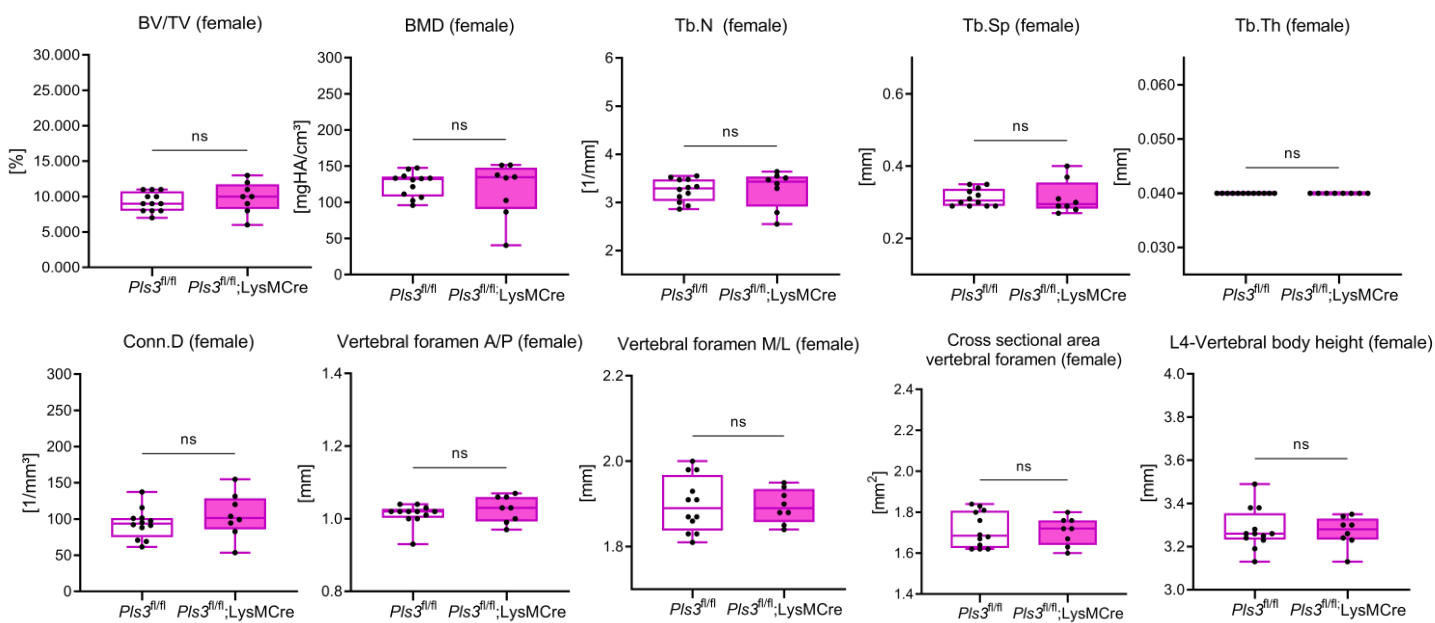**B****24-weeks**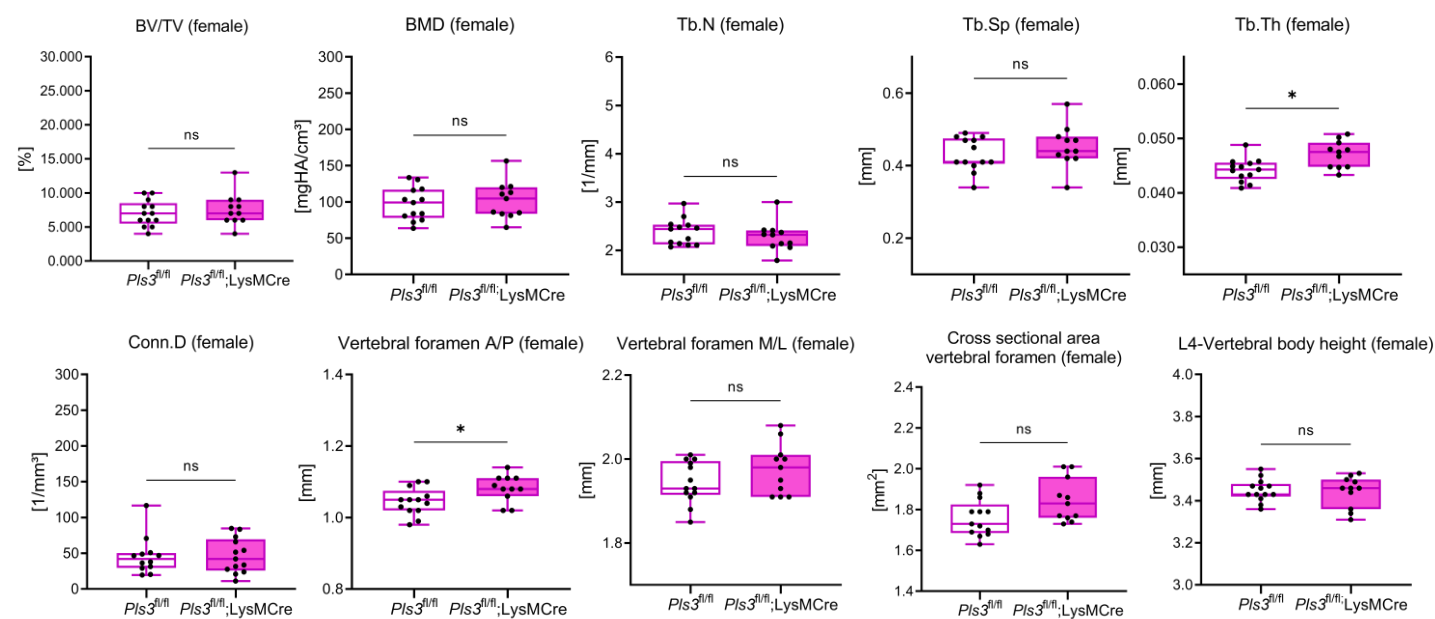**C****48-weeks**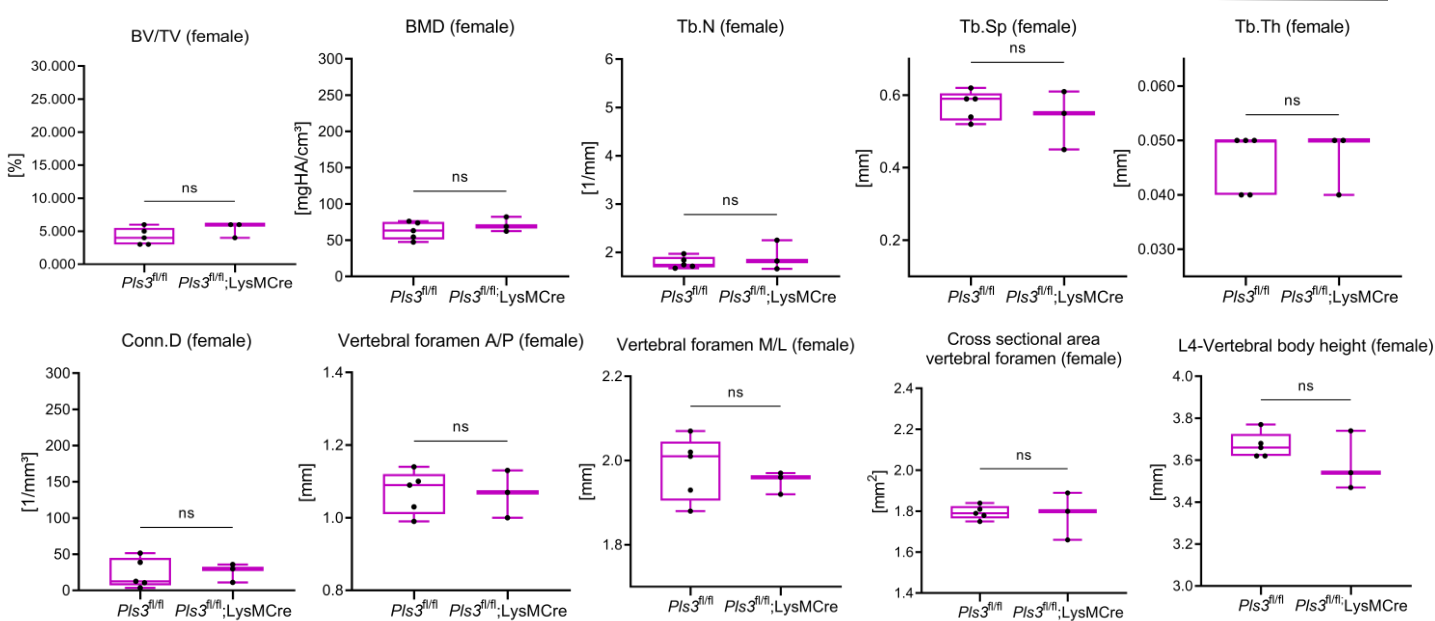

*Supplemental Fig. S5: MicroCT data of spine L4 from female  $Pls3^{fl/fl};LysMCre^{tg/0}$  mice in comparison to their  $Pls3^{fl/fl}$  littermates. Shown are bone volume fraction (BV/TV, %), bone mineral density (BMD, mmHA/cm<sup>3</sup>), trabecular number (Tb.N, 1/mm), trabecular separation (Tb.Sp, mm), trabecular thickness (Tb.Th, mm), and connectivity density (Conn.D, 1/mm<sup>3</sup>), vertebral foramen A/P (mm), vertebral foramen M/L (mm), cross sectional area of the vertebral foramen (mm<sup>2</sup>) and vertebral body height (mm) for (A) 12-, (B) for 24-, and (C) 48-week-old female mice. N = 8 of 12-week-old female  $Pls3^{fl/fl};LysMCre^{tg/0}$  mice; N = 12 of 12-week-old female  $Pls3^{fl/fl}$  mice; N = 11 of 24-week-old female  $Pls3^{fl/fl};LysMCre^{tg/0}$  mice; N = 13 of 24-week-old female  $Pls3^{fl/fl}$  mice; N = 3 of 48-week-old female  $Pls3^{fl/fl};LysMCre^{tg/0}$  mice; N = 5 of 48-week-old female  $Pls3^{fl/fl}$  mice. All results are shown as box plots, representing individual data points with median as a line, interquartile range (25th to 75th percentile), and min to max as whiskers. \* $P < 0.05$ , \*\* $P < 0.01$ , \*\*\* $P < 0.001$ , ns = not significant. Statistical test: Mann-Whitney U test.*

**A****12-weeks**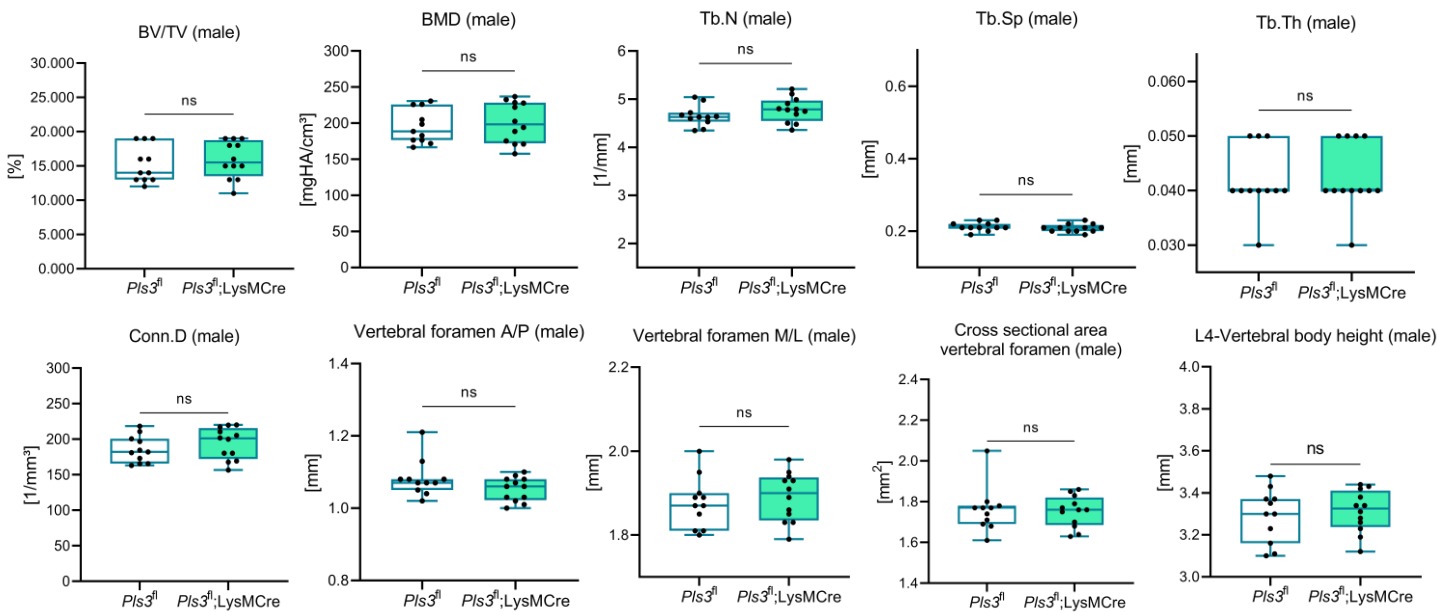**B****24-weeks**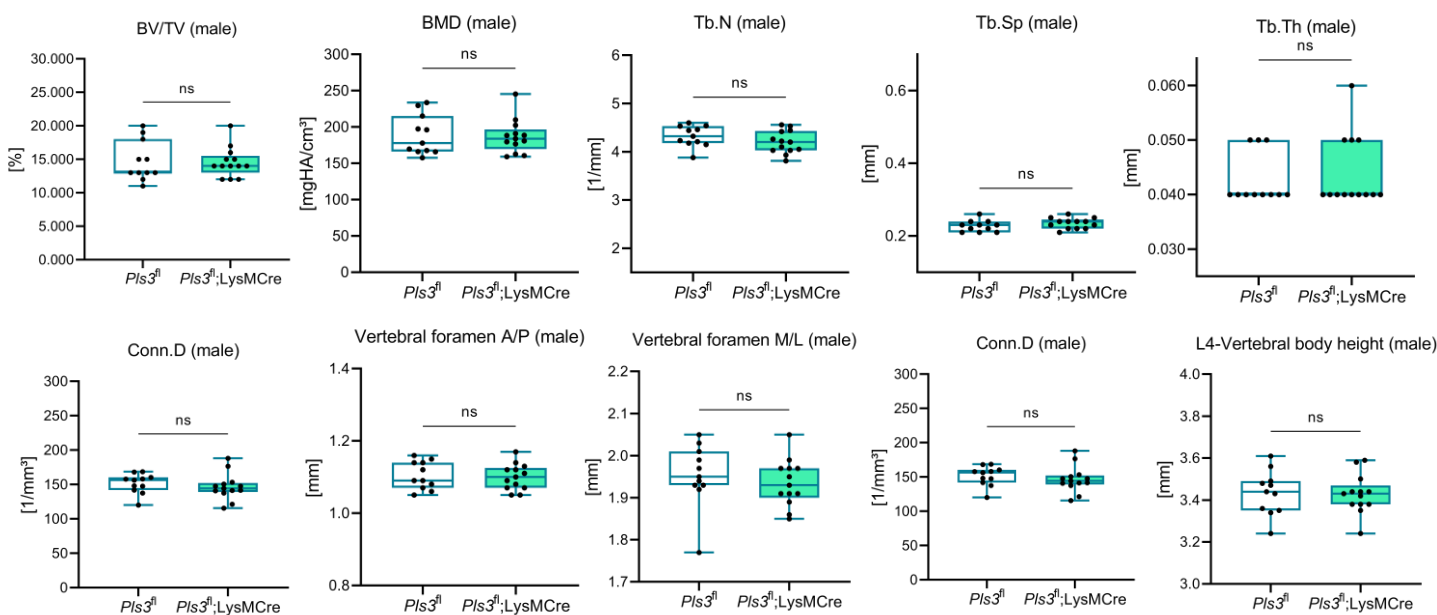**C****48-weeks**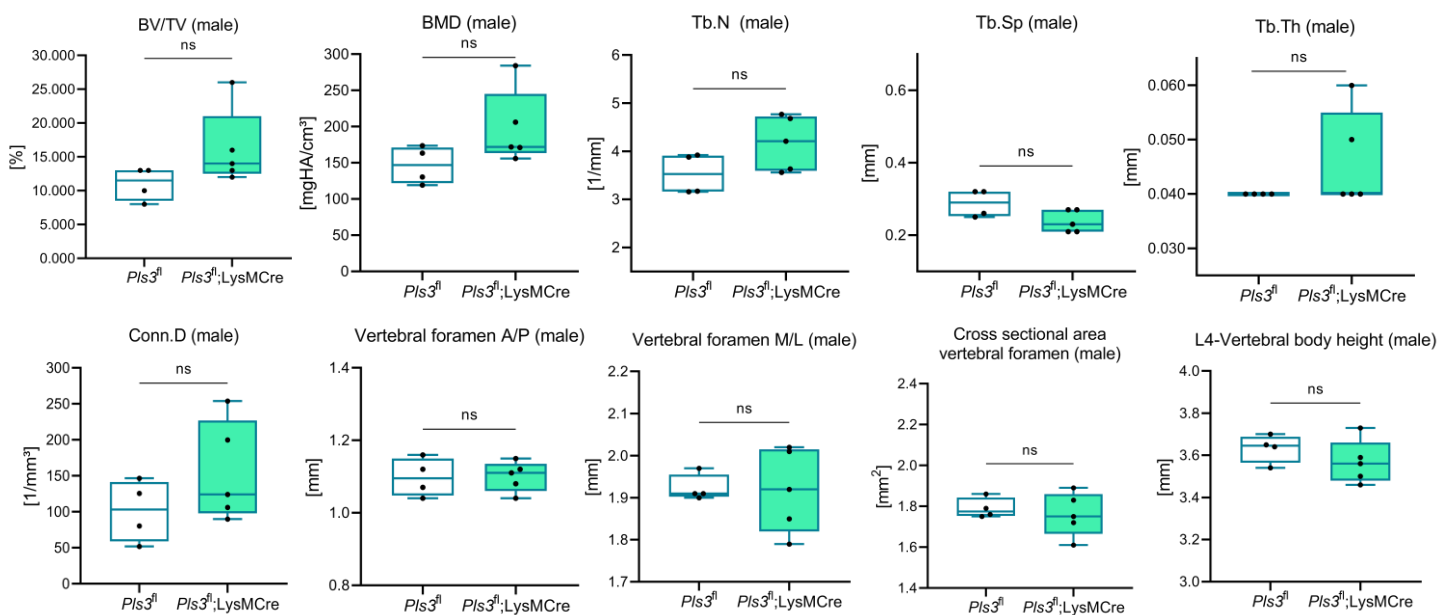



*Supplemental Fig. S6*: MicroCT data of spine L4 from male  $Pls3^{fl};LysMCre^{tg/0}$  mice in comparison to their  $Pls3^{fl}$  littermates. Shown are bone volume fraction (BV/TV, %), bone mineral density (BMD, mmHA/cm<sup>3</sup>), trabecular number (Tb.N, 1/mm), trabecular separation (Tb.Sp, mm), trabecular thickness (Tb.Th, mm), and connectivity density (Conn.D, 1/mm<sup>3</sup>), vertebral foramen A/P (mm), vertebral foramen M/L (mm), cross sectional area of the vertebral foramen (mm<sup>2</sup>) and vertebral body height (mm) for (A) 12-, (B) for 24-, and (C) 48-week-old male mice. N = 12 of 12-week-old male  $Pls3^{fl};LysMCre^{tg/0}$  mice; N = 11 of 12-week-old male  $Pls3^{fl}$  mice; N = 13 of 24-week-old male  $Pls3^{fl};LysMCre^{tg/0}$  mice; N = 11 of 24-week-old male  $Pls3^{fl}$  mice; N = 5 of 48-week-old male  $Pls3^{fl};LysMCre^{tg/0}$  mice; N = 4 of 48-week-old male  $Pls3^{fl}$  mice. All results are shown as box plots, representing individual data points with median as a line, interquartile range (25th to 75th percentile), and min to max as whiskers. \* $P < 0.05$ , \*\* $P < 0.01$ , \*\*\* $P < 0.001$ , ns = not significant. Statistical test: Mann-Whitney U test.

**A****12-weeks**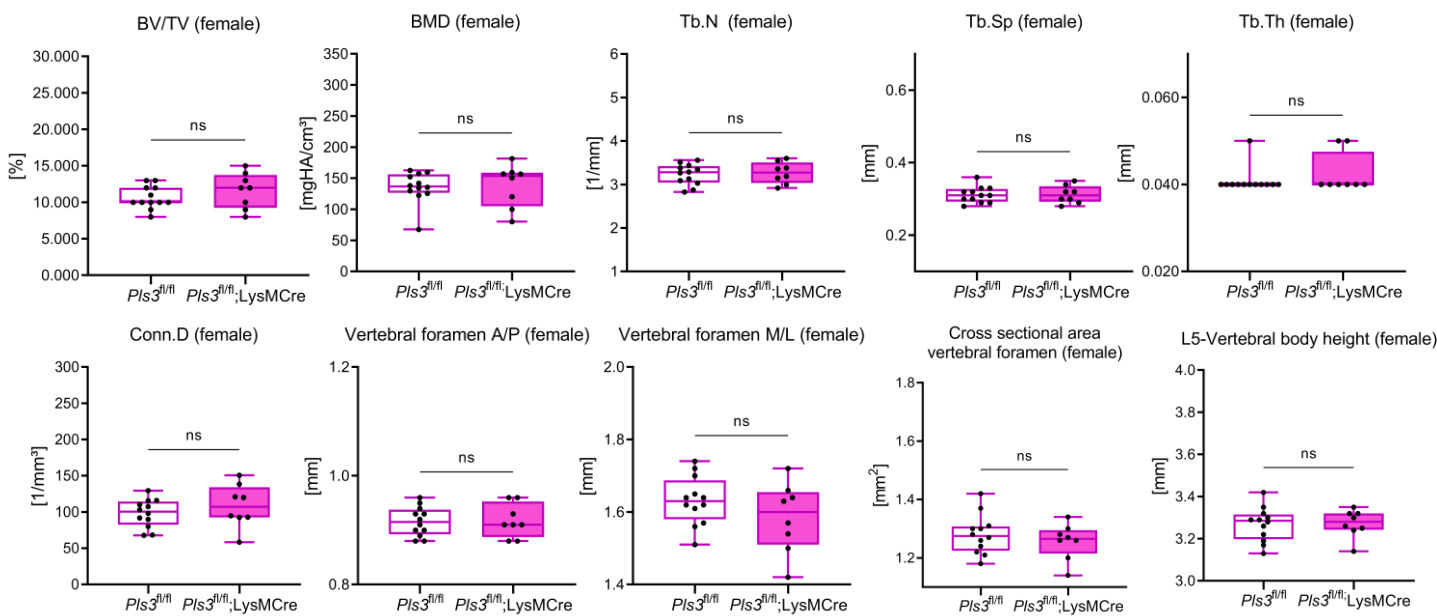**B****24-weeks**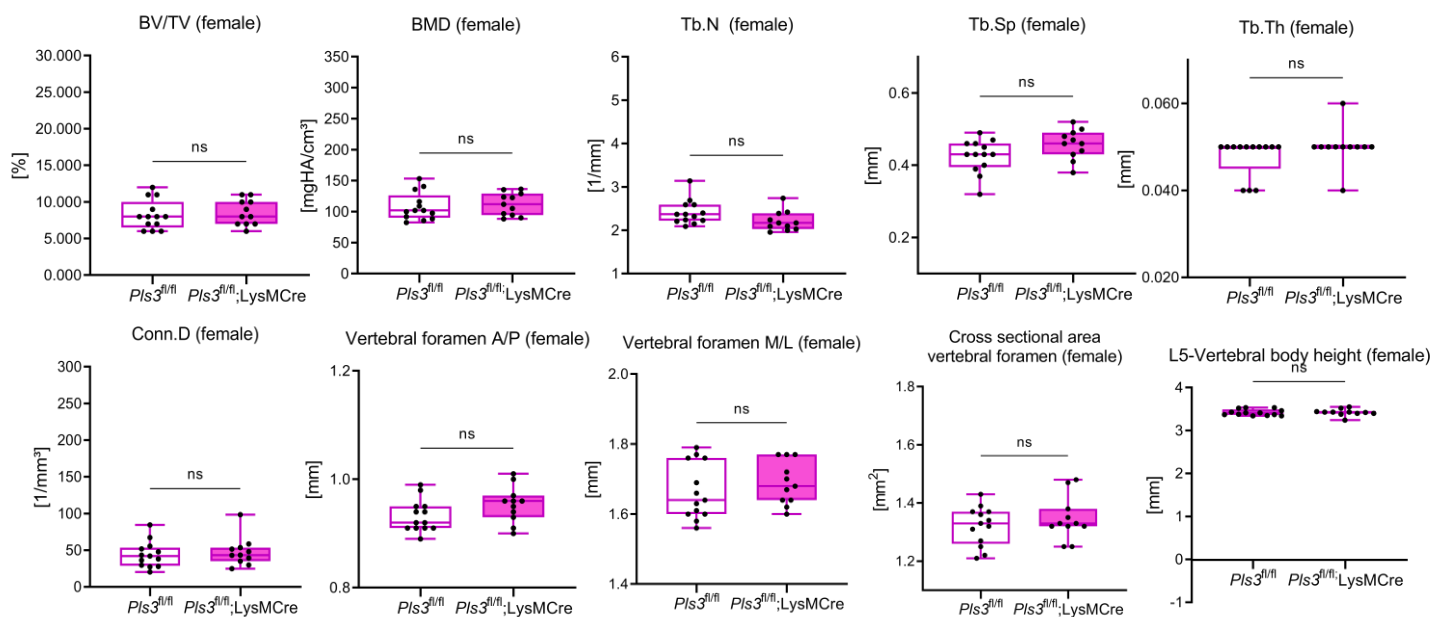**C****48-weeks**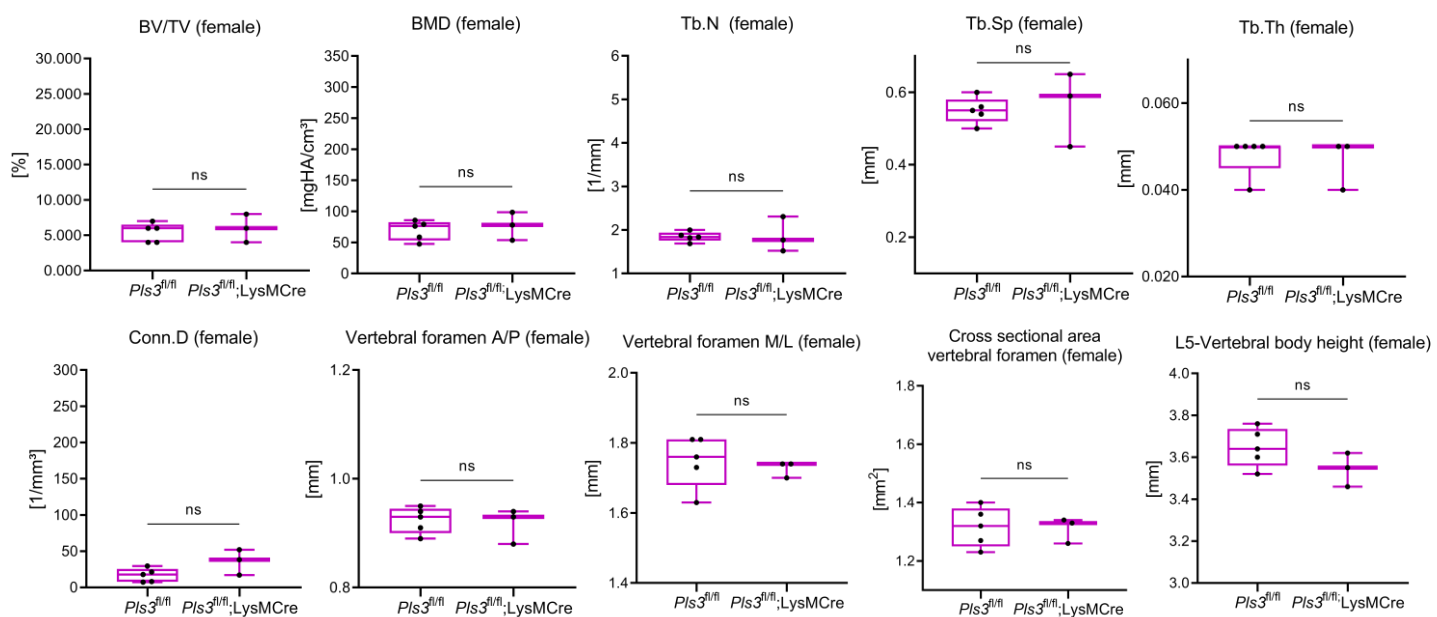

*Supplemental Fig. S7: MicroCT data of spine L5 from female  $Pls3^{fl/fl};LysMCre^{tg/0}$  mice in comparison to their  $Pls3^{fl/fl}$  littermates. Shown are bone volume fraction (BV/TV, %), bone mineral density (BMD, mmHA/cm<sup>3</sup>), trabecular number (Tb.N, 1/mm), trabecular separation (Tb.Sp, mm), trabecular thickness (Tb.Th, mm), and connectivity density (Conn.D, 1/mm<sup>3</sup>), vertebral foramen A/P (mm), vertebral foramen M/L (mm), cross sectional area of the vertebral foramen (mm<sup>2</sup>) and vertebral body height (mm) for (A) 12-, (B) for 24-, and (C) 48-week-old female mice. N = 8 of 12-week-old female  $Pls3^{fl/fl};LysMCre^{tg/0}$  mice; N = 12 of 12-week-old female  $Pls3^{fl/fl}$  mice; N = 11 of 24-week-old female  $Pls3^{fl/fl};LysMCre^{tg/0}$  mice; N = 13 of 24-week-old female  $Pls3^{fl/fl}$  mice; N = 3 of 48-week-old female  $Pls3^{fl/fl};LysMCre^{tg/0}$  mice; N = 5 of 48-week-old female  $Pls3^{fl/fl}$  mice. All results are shown as box plots, representing individual data points with median as a line, interquartile range (25th to 75th percentile), and min to max as whiskers. \* $P < 0.05$ , \*\* $P < 0.01$ , \*\*\* $P < 0.001$ , ns = not significant. Statistical test: Mann-Whitney U test.*

**A****12-weeks**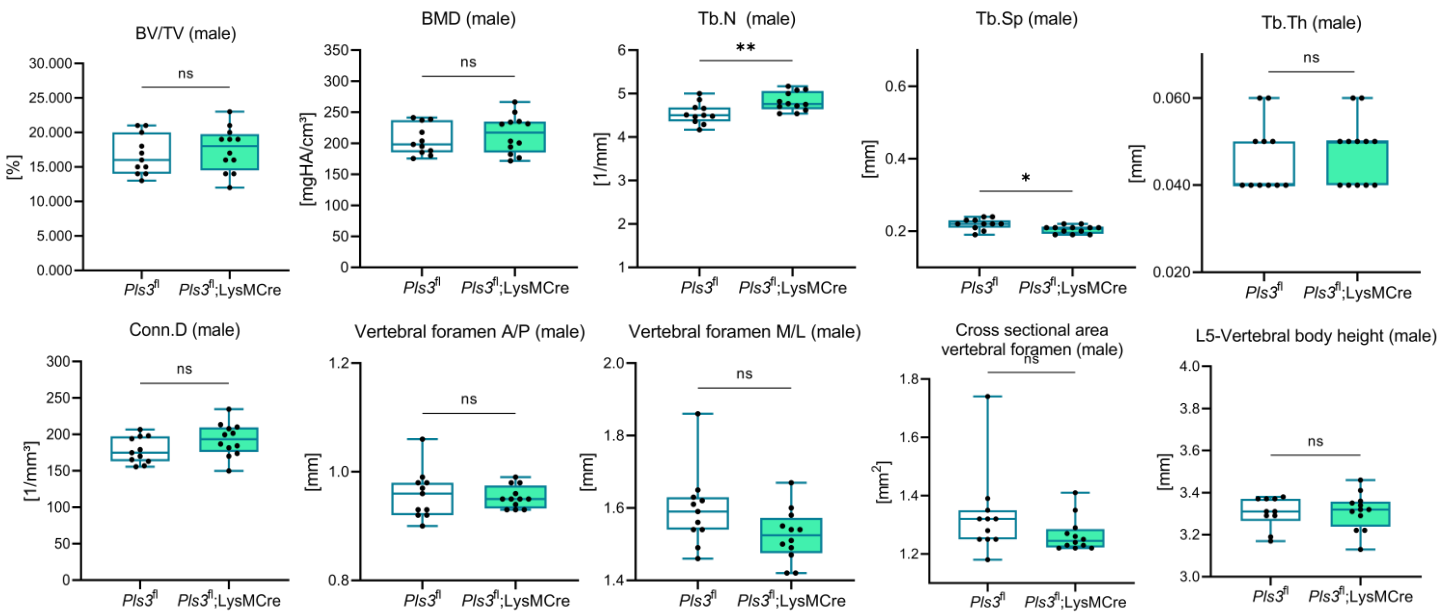**B****24-weeks**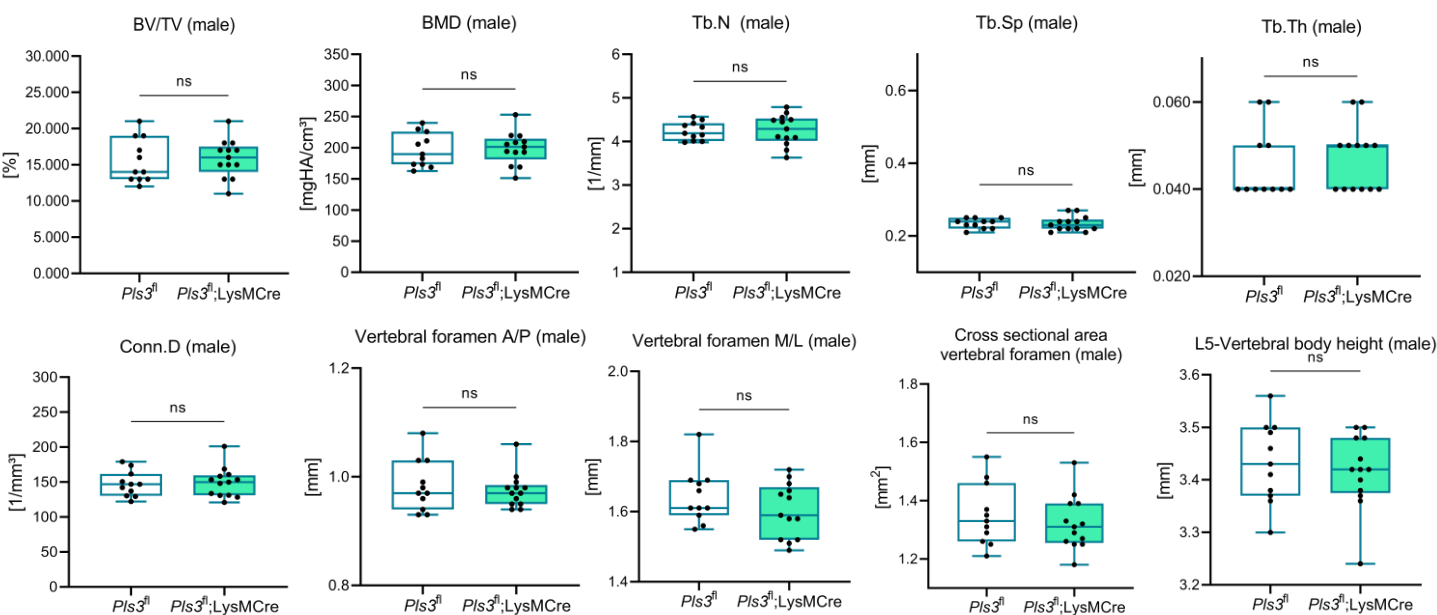**C****48-weeks**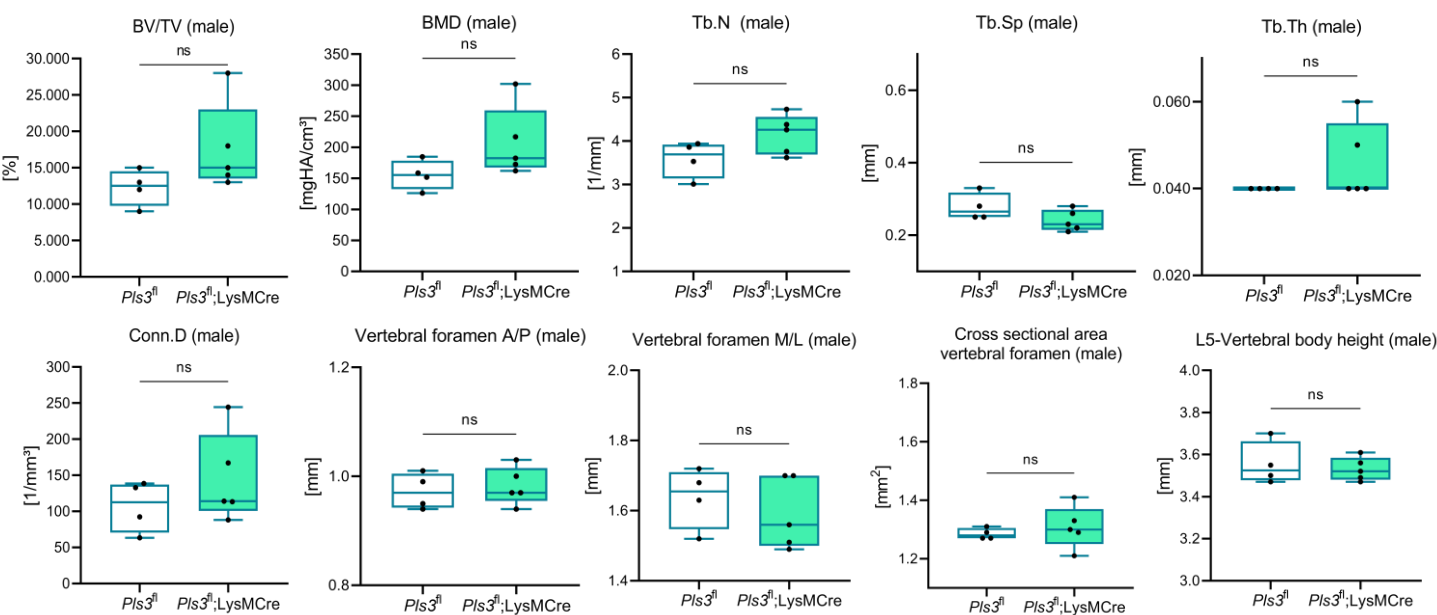

*Supplemental Fig. S8*: MicroCT data of spine L5 from male  $Pls3^{fl};LysMCre^{tg/0}$  mice in comparison to their  $Pls3^{fl}$  littermates. Shown are bone volume fraction (BV/TV, %), bone mineral density (BMD, mmHA/cm<sup>3</sup>), trabecular number (Tb.N, 1/mm), trabecular separation (Tb.Sp, mm), trabecular thickness (Tb.Th, mm), and connectivity density (Conn.D, 1/mm<sup>3</sup>), vertebral foramen A/P (mm), vertebral foramen M/L (mm), cross sectional area of the vertebral foramen (mm<sup>2</sup>) and vertebral body height (mm) for (A) 12-, (B) for 24-, and (C) 48-week-old male mice. N = 12 of 12-week-old male  $Pls3^{fl};LysMCre^{tg/0}$  mice; N = 11 of 12-week-old male  $Pls3^{fl}$  mice; N = 13 of 24-week-old male  $Pls3^{fl};LysMCre^{tg/0}$  mice; N = 11 of 24-week-old male  $Pls3^{fl}$  mice; N = 5 of 48-week-old male  $Pls3^{fl};LysMCre^{tg/0}$  mice; N = 4 of 48-week-old male  $Pls3^{fl}$  mice. All results are shown as box plots, representing individual data points with median as a line, interquartile range (25th to 75th percentile), and min to max as whiskers. \* $P < 0.05$ , \*\* $P < 0.01$ , \*\*\* $P < 0.001$ , ns = not significant. Statistical test: Mann-Whitney U test.

**A****12-weeks**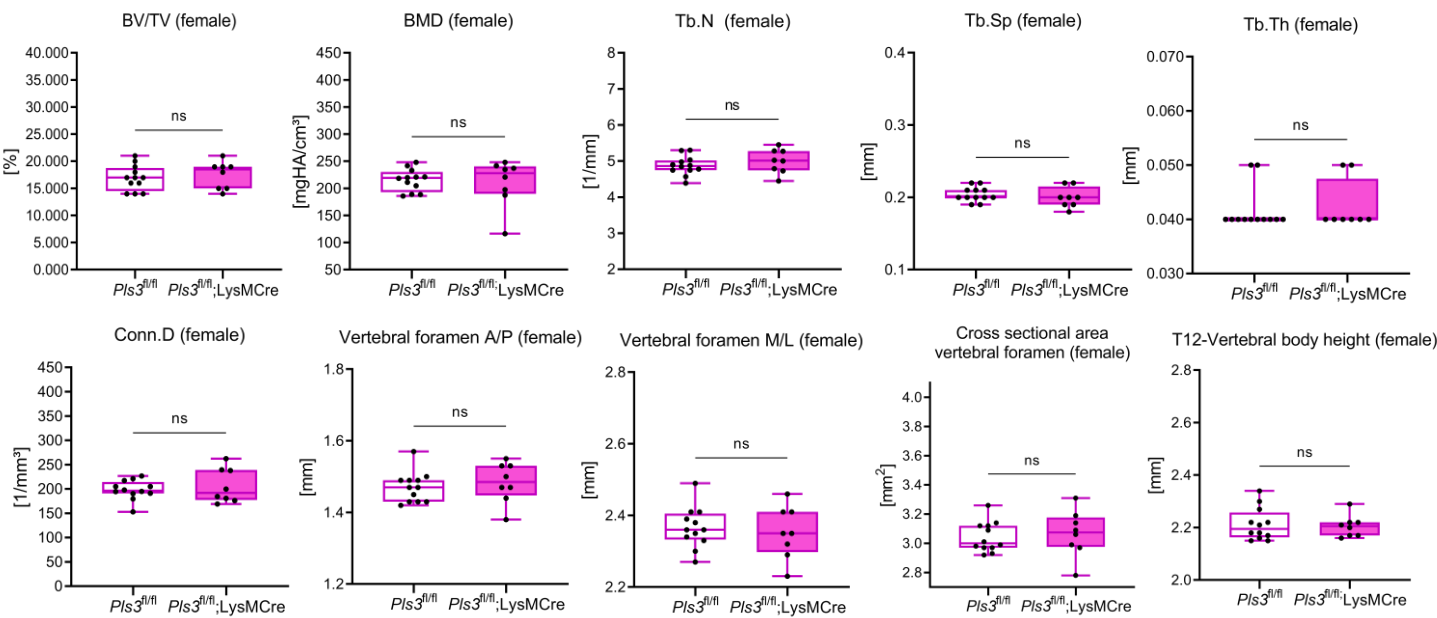**B****24-weeks**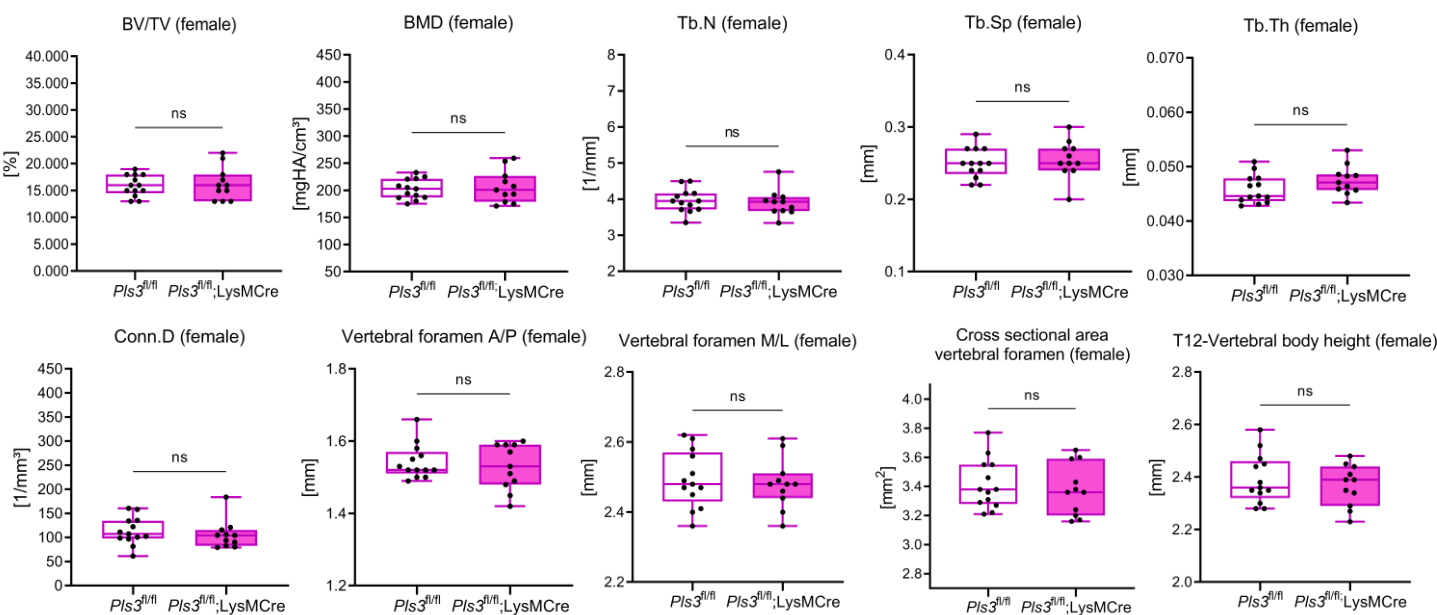**C****48-weeks**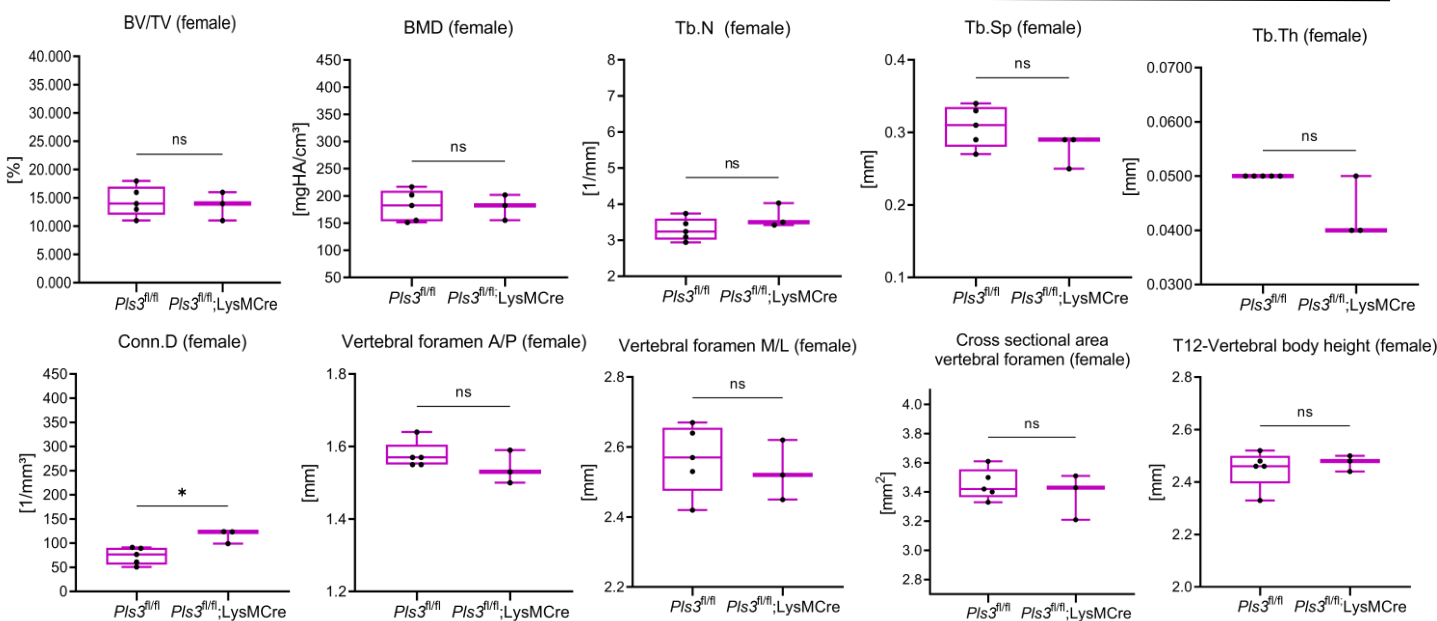

*Supplemental Fig. S9*: MicroCT data of spine T12 from female  $Pls3^{fl/fl};LysMCre^{tg/0}$  mice in comparison to their  $Pls3^{fl/fl}$  littermates. Shown are bone volume fraction (BV/TV, %), bone mineral density (BMD, mmHA/cm<sup>3</sup>), trabecular number (Tb.N, 1/mm), trabecular separation (Tb.Sp, mm), trabecular thickness (Tb.Th, mm), and connectivity density (Conn.D, 1/mm<sup>3</sup>), vertebral foramen A/P (mm), vertebral foramen M/L (mm), cross sectional area of the vertebral foramen (mm<sup>2</sup>) and vertebral body height (mm) for (A) 12-, (B) for 24-, and (C) 48-week-old female mice. N = 8 of 12-week-old female  $Pls3^{fl/fl};LysMCre^{tg/0}$  mice; N = 12 of 12-week-old female  $Pls3^{fl/fl}$  mice; N = 11 of 24-week-old female  $Pls3^{fl/fl};LysMCre^{tg/0}$  mice; N = 13 of 24-week-old female  $Pls3^{fl/fl}$  mice; N = 3 of 48-week-old female  $Pls3^{fl/fl};LysMCre^{tg/0}$  mice; N = 5 of 48-week-old female  $Pls3^{fl/fl}$  mice. All results are shown as box plots, representing individual data points with median as a line, interquartile range (25th to 75th percentile), and min to max as whiskers. \* $P < 0.05$ , \*\* $P < 0.01$ , \*\*\* $P < 0.001$ , ns = not significant. Statistical test: Mann-Whitney U test.

**A****12-weeks**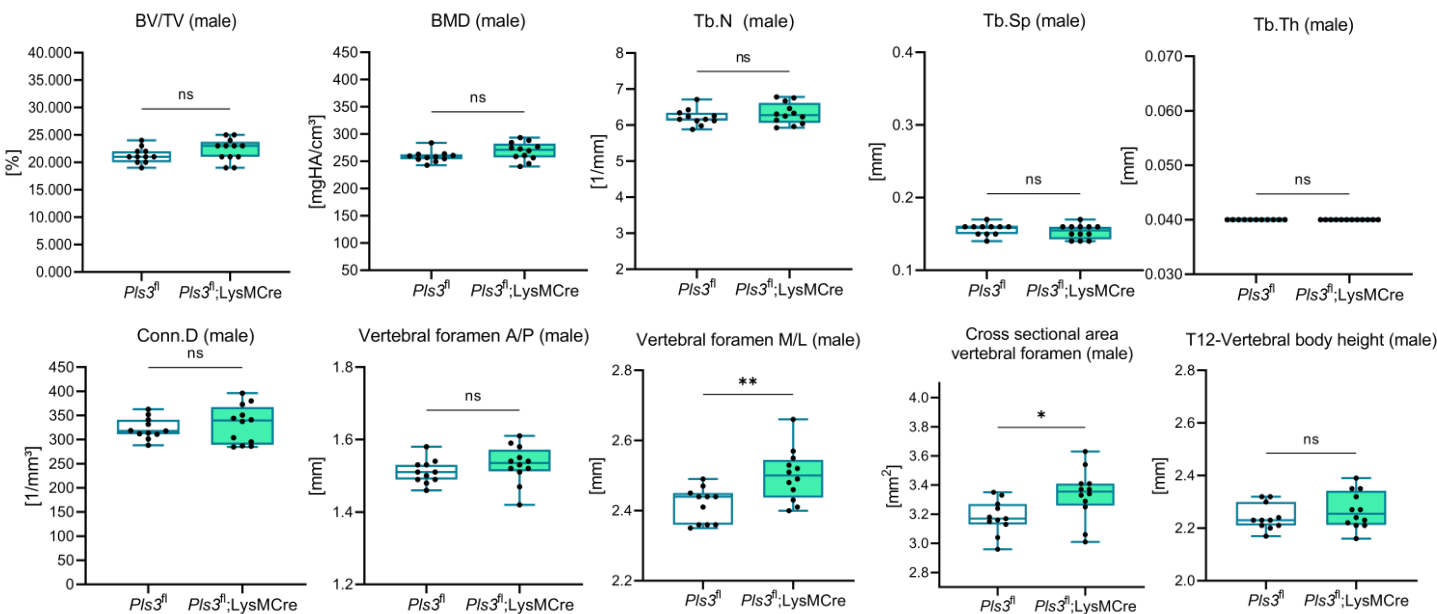**B****24-weeks**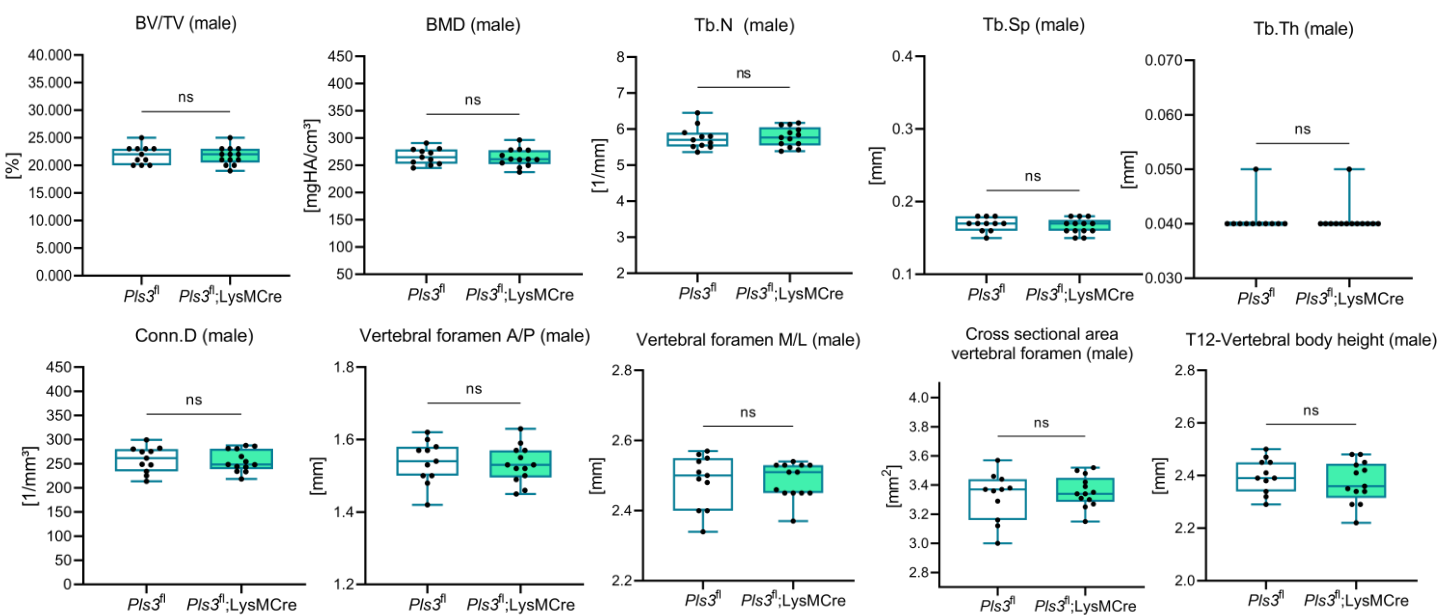**C****48-weeks**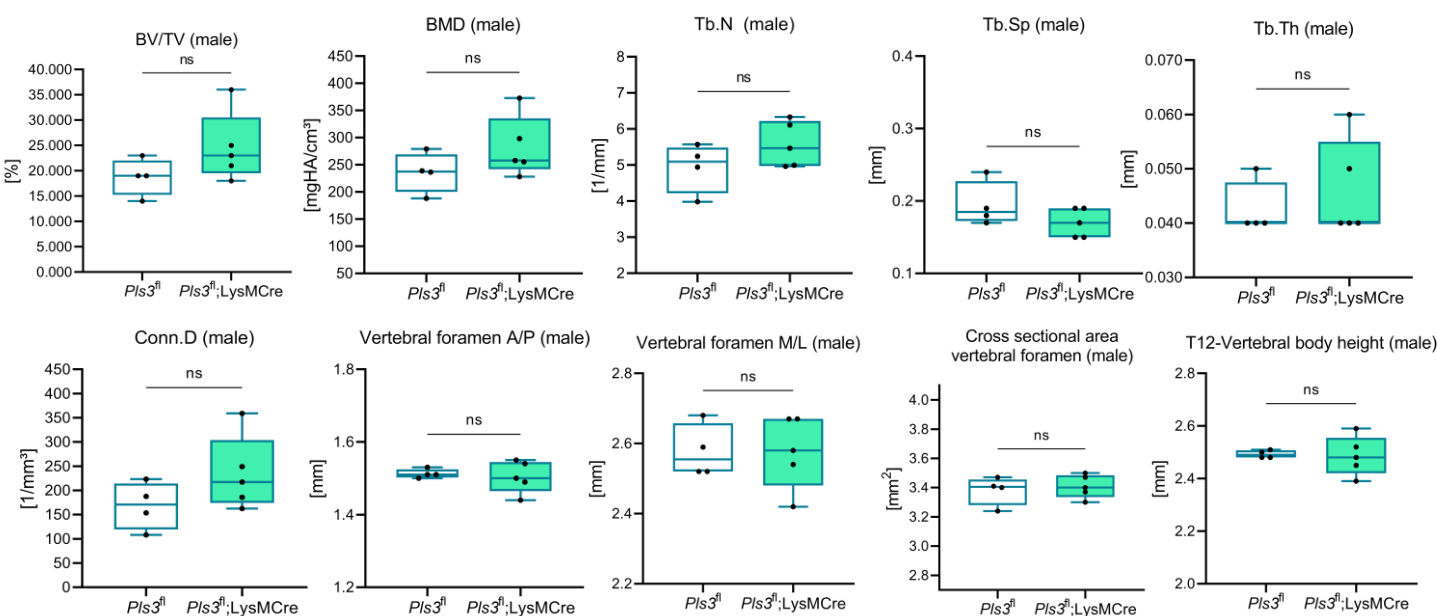



*Supplemental Fig. S10:* MicroCT data of spine T12 from male  $Pls3^{fl};LysMCre^{tg/0}$  mice in comparison to their  $Pls3^{fl}$  littermates. Shown are bone volume fraction (BV/TV, %), bone mineral density (BMD, mmHA/cm<sup>3</sup>), trabecular number (Tb.N, 1/mm), trabecular separation (Tb.Sp, mm), trabecular thickness (Tb.Th, mm), and connectivity density (Conn.D, 1/mm<sup>3</sup>), vertebral foramen A/P (mm), vertebral foramen M/L (mm), cross sectional area of the vertebral foramen (mm<sup>2</sup>) and vertebral body height (mm) for (A) 12-, (B) for 24-, and (C) 48-week-old male mice. N = 12 of 12-week-old male  $Pls3^{fl};LysMCre^{tg/0}$  mice; N = 11 of 12-week-old male  $Pls3^{fl}$  mice; N = 13 of 24-week-old male  $Pls3^{fl};LysMCre^{tg/0}$  mice; N = 11 of 24-week-old male  $Pls3^{fl}$  mice; N = 5 of 48-week-old male  $Pls3^{fl};LysMCre^{tg/0}$  mice; N = 4 of 48-week-old male  $Pls3^{fl}$  mice. All results are shown as box plots, representing individual data points with median as a line, interquartile range (25th to 75th percentile), and min to max as whiskers. \* $P < 0.05$ , \*\* $P < 0.01$ , \*\*\* $P < 0.001$ , ns = not significant. Statistical test: Mann-Whitney U test.

**A****12-weeks**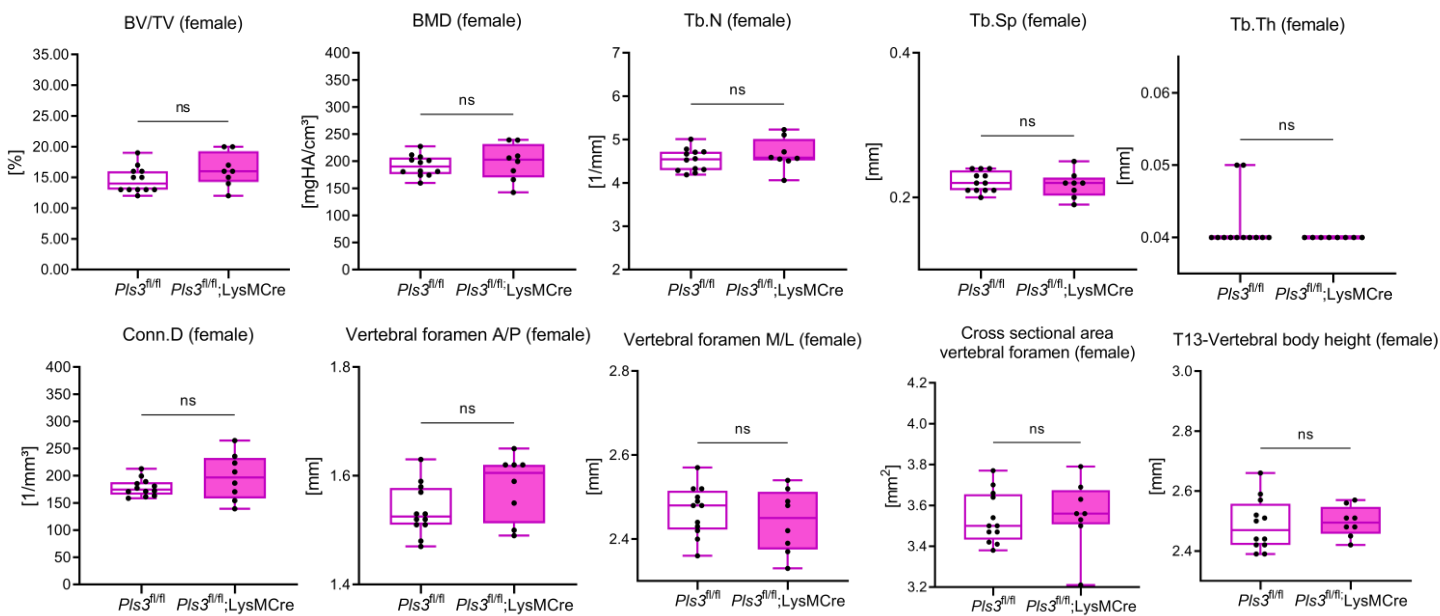**B****24-weeks**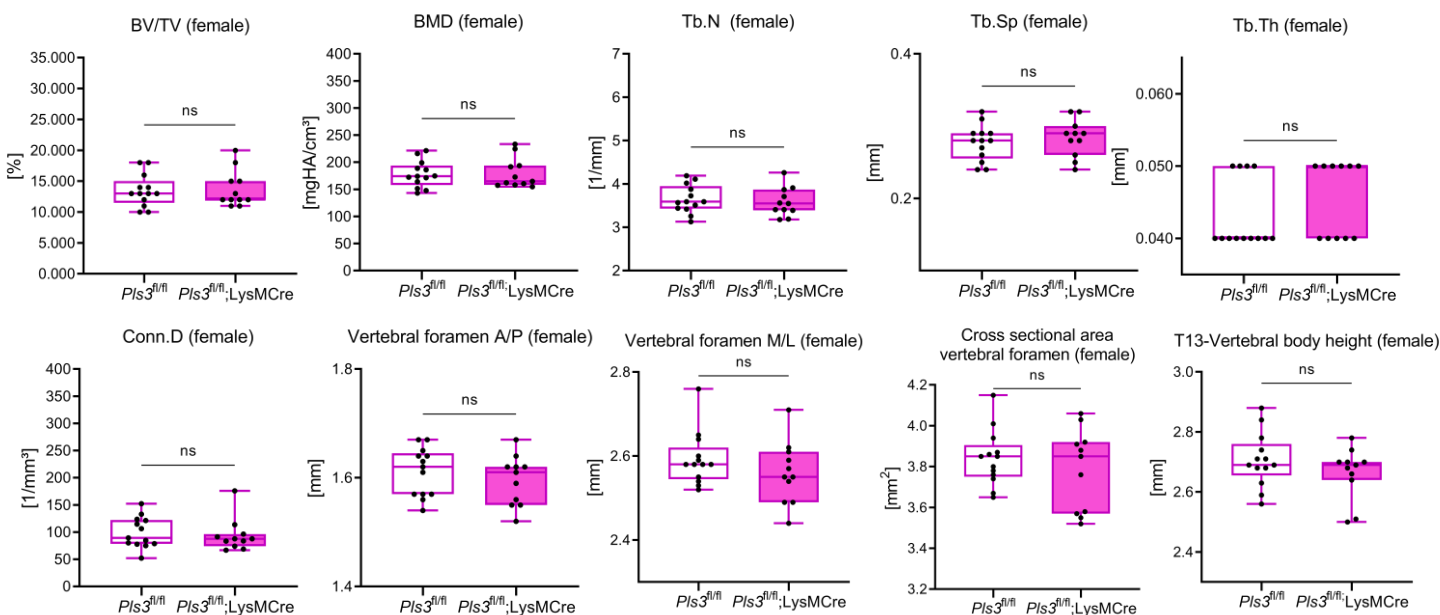**C****48-weeks**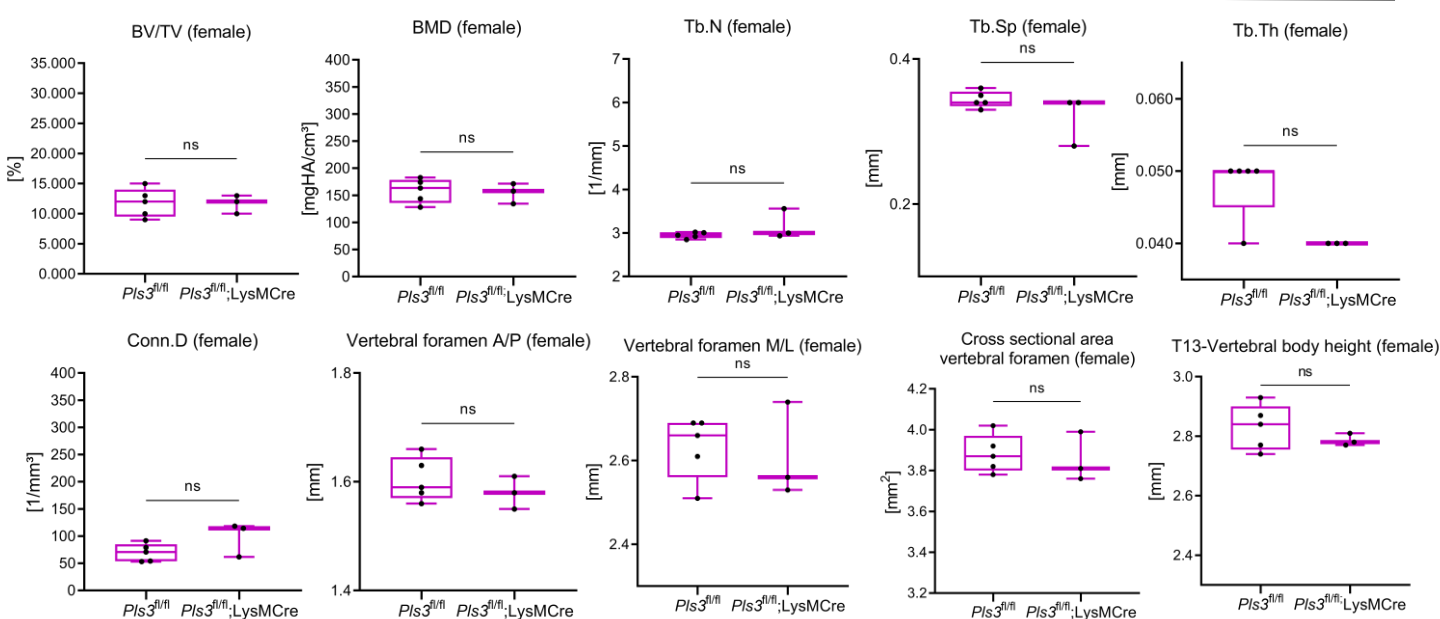

*Supplemental Fig. S11:* MicroCT data of the spine T13 from female  $Pls3^{fl/fl};LysMCre^{tg/0}$  mice in comparison to their  $Pls3^{fl/fl}$  littermates. Shown are bone volume fraction (BV/TV, %), bone mineral density (BMD, mmHA/cm<sup>3</sup>), trabecular number (Tb.N, 1/mm), trabecular separation (Tb.Sp, mm), trabecular thickness (Tb.Th, mm), and connectivity density (Conn.D, 1/mm<sup>3</sup>), vertebral foramen A/P (mm), vertebral foramen M/L (mm), cross sectional area of the vertebral foramen (mm<sup>2</sup>) and vertebral body height (mm) for (A) 12-, (B) for 24-, and (C) 48-week-old female mice. N = 8 of 12-week-old female  $Pls3^{fl/fl};LysMCre^{tg/0}$  mice; N = 12 of 12-week-old female  $Pls3^{fl/fl}$  mice; N = 11 of 24-week-old female  $Pls3^{fl/fl};LysMCre^{tg/0}$  mice; N = 13 of 24-week-old female  $Pls3^{fl/fl}$  mice; N = 3 of 48-week-old female  $Pls3^{fl/fl};LysMCre^{tg/0}$  mice; N = 5 of 48-week-old female  $Pls3^{fl/fl}$  mice. All results are shown as box plots, representing individual data points with median as a line, interquartile range (25th to 75th percentile), and min to max as whiskers. \* $P < 0.05$ , \*\* $P < 0.01$ , \*\*\* $P < 0.001$ , ns = not significant. Statistical test: Mann-Whitney U test.

**A****12-weeks**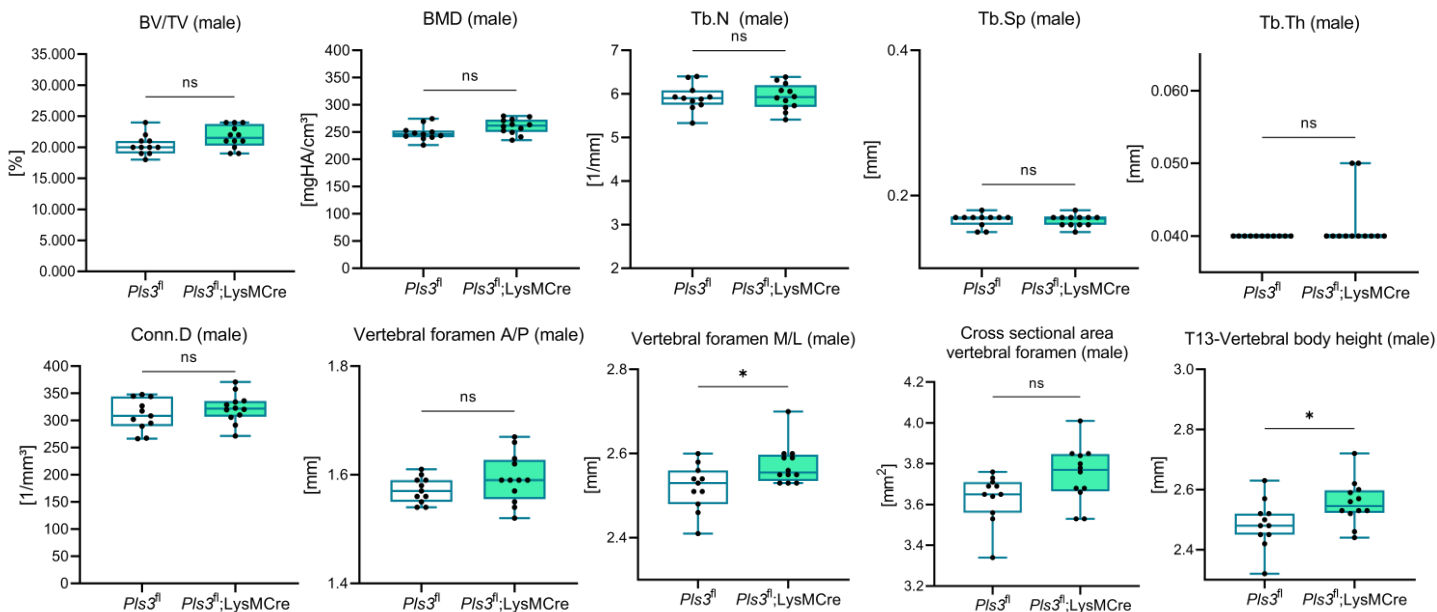**B****24-weeks**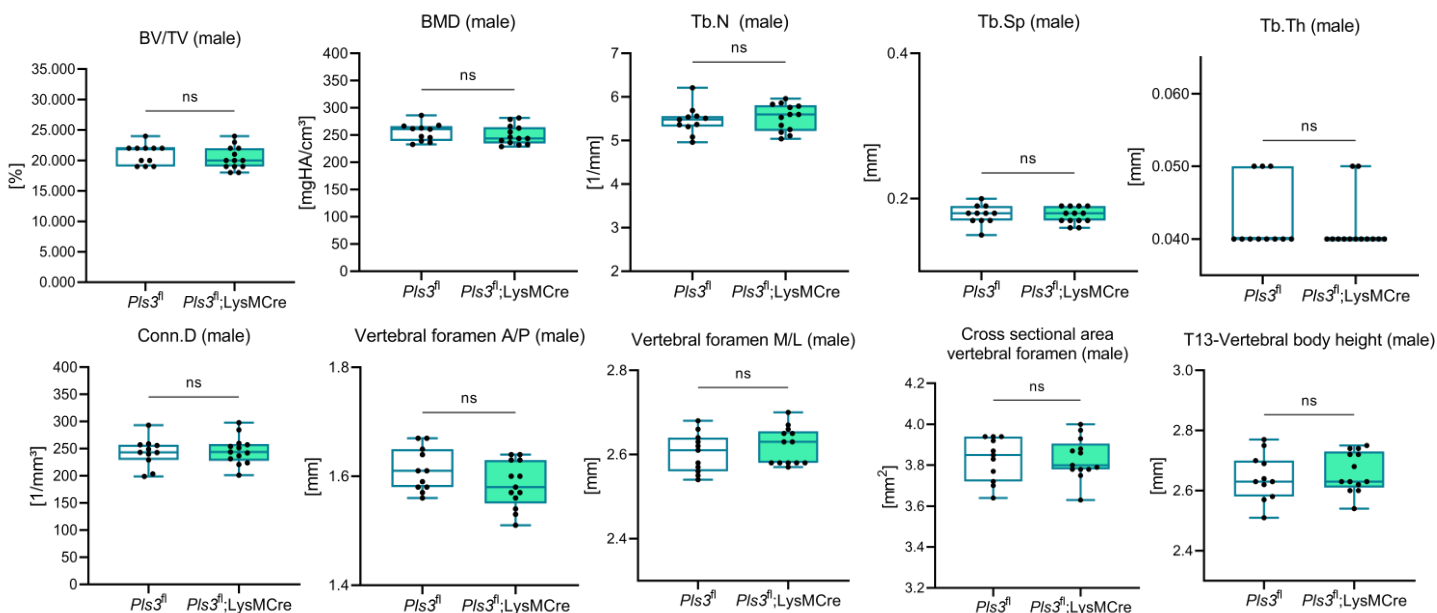**C****48-weeks**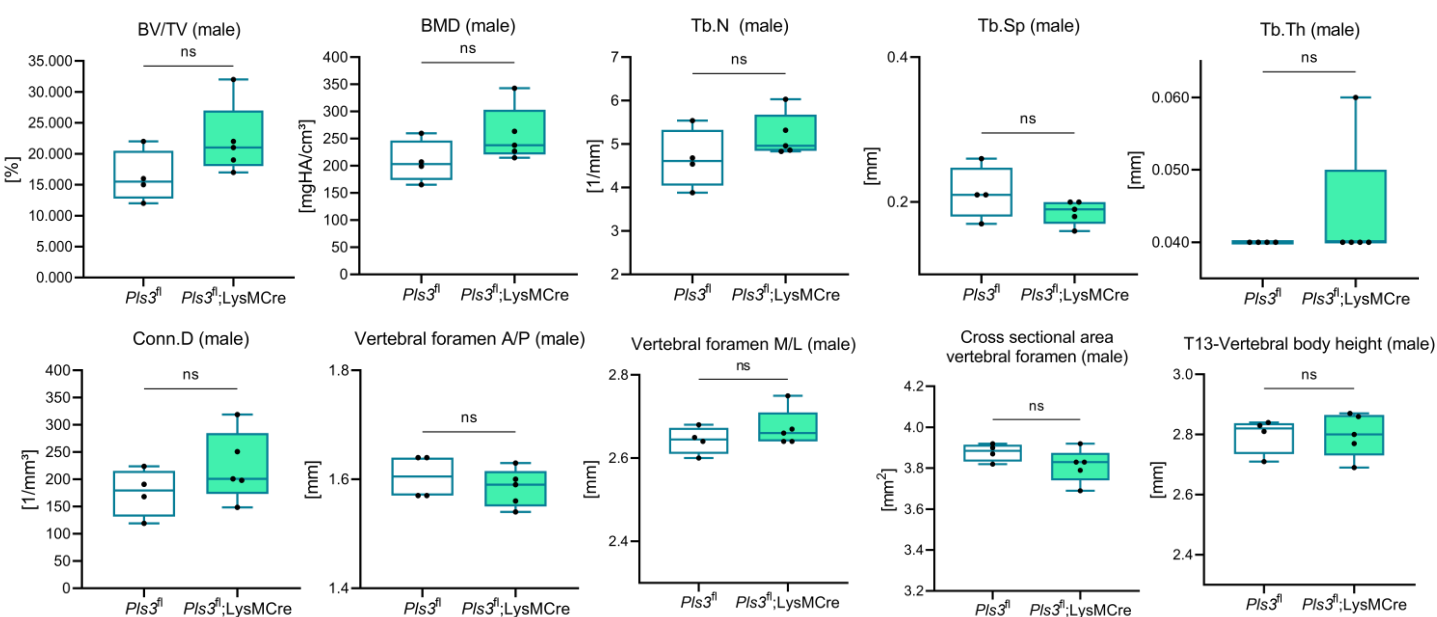

*Supplemental Fig. S12: MicroCT data of the spine T13 from male  $Pls3^{fl};LysMCre^{tg/0}$  mice in comparison to their  $Pls3^{fl}$  littermates. Shown are bone volume fraction (BV/TV, %), bone mineral density (BMD, mmHA/cm<sup>3</sup>), trabecular number (Tb.N, 1/mm), trabecular separation (Tb.Sp, mm), trabecular thickness (Tb.Th, mm), and connectivity density (Conn.D, 1/mm<sup>3</sup>), vertebral foramen A/P (mm), vertebral foramen M/L (mm), cross sectional area of the vertebral foramen (mm<sup>2</sup>) and vertebral body height (mm) for (A) 12-, (B) for 24-, and (C) 48-week-old male mice. N = 12 of 12-week-old male  $Pls3^{fl};LysMCre^{tg/0}$  mice; N = 11 of 12-week-old male  $Pls3^{fl}$  mice; N = 13 of 24-week-old male  $Pls3^{fl};LysMCre^{tg/0}$  mice; N = 11 of 24-week-old male  $Pls3^{fl}$  mice; N = 5 of 48-week-old male  $Pls3^{fl};LysMCre^{tg/0}$  mice; N = 4 of 48-week-old male  $Pls3^{fl}$  mice. All results are shown as box plots, representing individual data points with median as a line, interquartile range (25th to 75th percentile), and min to max as whiskers. \* $P < 0.05$ , \*\* $P < 0.01$ , \*\*\* $P < 0.001$ , ns = not significant. Statistical test: Mann-Whitney U test.*

A

48-weeks

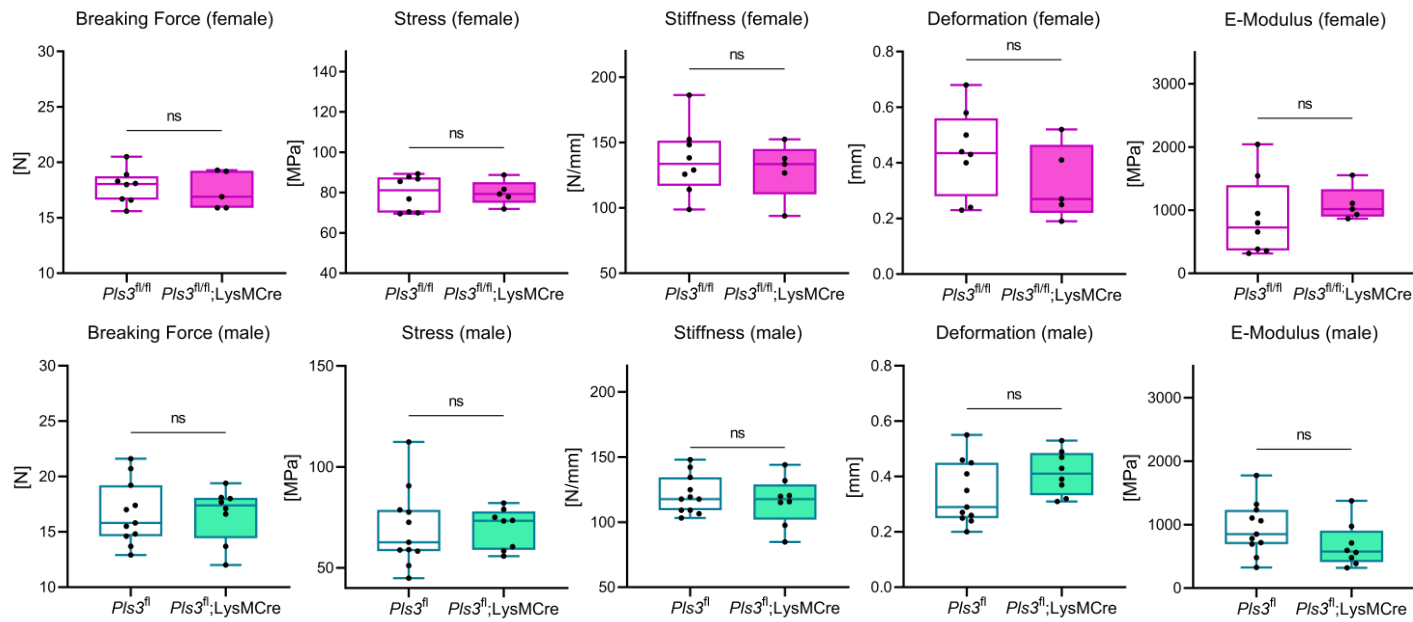

**Supplemental Fig. S13:** 3-point-bending-test (3-PBT) of 48-week-old female and male  $Pls3^{fl/fl};LysMCre^{tg/0}$  mice in comparison to their  $Pls3^{fl/fl}$  littermates. Shown are breaking force, ultimate stress, stiffness, deformation, and Elastic-modulus (E-modulus). N = 5 of 48-week-old female  $Pls3^{fl/fl};LysMCre^{tg/0}$  mice; N = 8 of 48-week-old female  $Pls3^{fl/fl}$  mice; N = 8 of 48-week-old male  $Pls3^{fl/fl};LysMCre^{tg/0}$  mice; N = 11 of 48-week-old male  $Pls3^{fl/fl}$  mice. All results are shown as box plots, representing individual data points with median as a line, interquartile range (25th to 75th percentile), and min to max as whiskers. \* $P < 0.05$ , \*\* $P < 0.01$ , \*\*\* $P < 0.001$ , ns = not significant. Statistical test: Mann-Whitney U test.
